# Supplementary material for: KIF26B and CREB3L1 Derived from Immunoscore Could Inhibit the Progression of Ovarian Cancer
Source: Hindawi journal article supplement (doi:10.1155/2024/4817924), 2024-01-01
Supplement: f1 [file 4817924.f1.pdf]

Sample dendrogram and trait heatmap

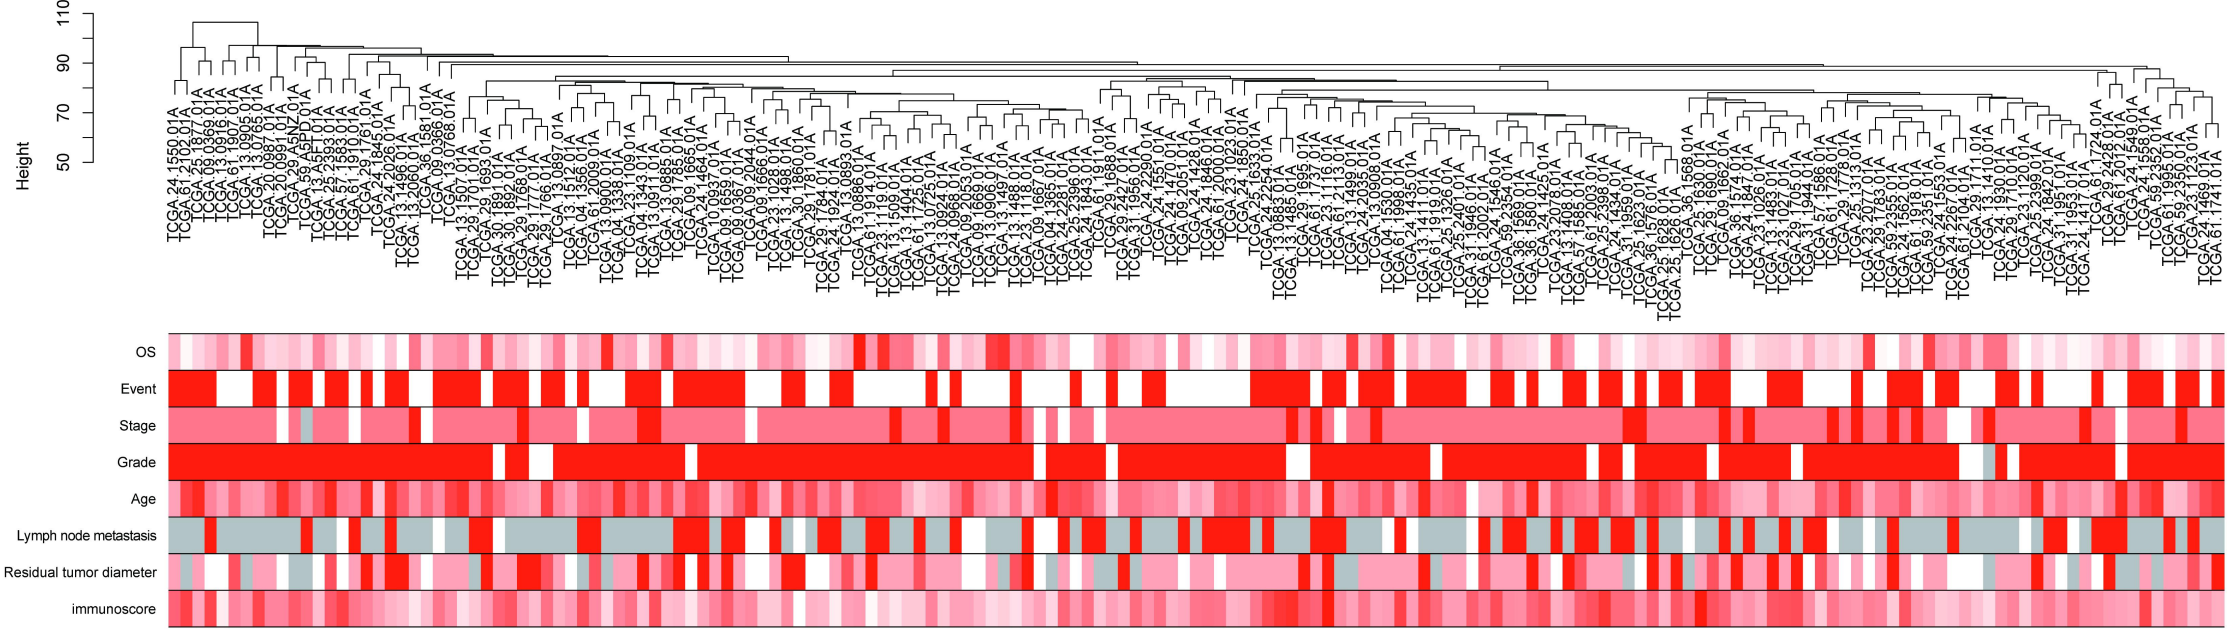

Figure S1. The clustering of OV samples with the corresponding clinical phenotypes.
