# Supplementary material for: KIF26B and CREB3L1 Derived from Immunoscore Could Inhibit the Progression of Ovarian Cancer
Source: J Immunol Res. 2024 Feb 13;2024:4817924. doi: 10.1155/2024/4817924 (PMC10878761; doi:10.1155/2024/4817924)
Supplement: Supplementary 3 — The key genes in the blue module and red module. [file 4817924.f3.txt]

Table S2: The key genes in the blue module and red module
Blue module	Red module
COL3A1	IFI44L
COL5A1	MX1
THBS2	OAS2
COL1A1	IFI44
COL5A2	RSAD2
MMP2	GBP4
FN1	IFIT3
COL1A2	OASL
AEBP1	CMPK2
COL6A3	IFIT2
MFAP4	HERC6
VCAN	OAS3
DCN	TAP1
LOX	OAS1
SPARC	IFIH1
ADAM12	SAMD9
COL8A1	ETV7
COL6A2	DDX58
PTGIS	PARP14
ITGA11	TRIM22
CREB3L1	PARP9
PRRX1	SAMD9L
BGN	DDX60
CDH11	DTX3L
EMILIN1	PARP12
PDPN
COL6A1
OLFML2B
CCDC80
CRISPLD2
SNAI2
SERPINF1
THBS1
ADAMTS2
ISM1
FBN1
FAP
PDLIM3
GLT8D2
MMP14
SULF2
PCOLCE
PDGFRB
CAVIN1
ANTXR1
ADAMTS12
FSTL1
CLMP
LOXL2
PODN
CCN4
PALLD
IGFBP4
OLFML1
COLEC12
SRPX2
TIMP2
COL16A1
FILIP1L
ITGA5
NID1
C1QTNF6
ZNF469
TGFB1I1
SSC5D
KIF26B
LAMB1
KCNE4
PDGFRA
LHFPL6
PMP22
NUAK1
TGFB3
GASK1B
CALD1
ANGPTL2
FZD1
ADGRA2
DACT1
MSRB3
GPC6
BICC1
HEPH
MEIS3
FRMD6
ECM2
MRVI1
ETV1
ANTXR2
SVEP1
ARSI
LZTS1
