# Supplementary material for: KIF26B and CREB3L1 Derived from Immunoscore Could Inhibit the Progression of Ovarian Cancer
Source: J Immunol Res. 2024 Feb 13;2024:4817924. doi: 10.1155/2024/4817924 (PMC10878761; doi:10.1155/2024/4817924)
Supplement: Supplementary 4 — The DEGs of GSE18520 and GSE26712. [file 4817924.f4.txt]

Table S3: The DEGs of GSE18520 and GSE26712
GSE18520		GSE26712
Up-regulated DEGs	Down-regulated DEGs	Up-regulated DEGs	Down-regulated DEGs
MECOM	LINC01105	C9orf16	BNC1
KLHL14	ITLN1	PPDPF	KDR
CD24	PRG4	MAZ	NELL2
CLDN4	HAND2-AS1	MRPL2	TMEM255A
PSAT1	ABCA8	FKBP8	MNDA
SOX17	CALB2	NOTCH3	NPY1R
IQGAP3	NPY1R	CALR	CLEC4M
CHMP4C	DIRAS3	GSTP1	GPM6A
ABHD11	REEP1	PFN1	LGALS8
BUB1	C21orf62	XKR8	REEP1
PAX8	PDE8B	MAPKAPK2	PRG4
MPZL2	GPRASP1	ABCF3	CLDN15
WFDC2	AOX1	S100A13	S100PBP
CP	GADL1	OGFOD2	DFNA5
NUF2	WNT2B	GANAB	SLC46A3
ASF1B	DFNA5	CD24	PROCR
RHPN1-AS1	PEX5L	PRMT1	ZNF23
FOLR1	SYT4	GRINA	C21orf62
KIF20A	ADH1C	B3GAT3	PSD3
ILDR1	LOC646762	WFDC2	ZNF112
NEK2	CLDN15	ARF5	MST4
TMEM139	AADACL2	SCAMP4	CYP39A1
TPX2	MNDA	PKM	ATP10D
JMJD4	HBB	H2AFX	CALB2
MCM4	BCHE	SOX17	FGF13
GRHL2	BMP2	CORO1B	PDE8B
SORT1	TCEAL7	TSPAN15	SPOCK1
PDE9A	MGARP	PRKCSH	ZNF350
KIF2C	SEL1L2	IGFBP2	KIAA0226L
CLDN3	CHGB	ATP5H	AOX1
KIF4A	GABRG1	CASKIN2	RNF128
SLC39A4	LOC100506834	CLPTM1	NBEA
LOC100129098	CLEC4M	CLDN3	ETFDH
TRIP13	CXorf57	INTS5	DPY19L1
PANK1	PPM1K	TSPAN14	ADH1C
EPCAM	TCF21	CRABP2	PCDH9
TTK	THBD	KLC2	RPL23AP32
ECE2	KDR	WDTC1	WNT2B
HJURP	BNC1	PXN	DSC3
CENPE	PRSS35	PTK7	BCHE
ELF3	SHISA3	CNOT3	MAP3K8
BAK1	GFPT2	MECOM	PLCE1
SLC52A2	BCO2	COPE	SECISBP2
ISG20L2	TCEAL2	ABHD11	MAF
CDCA3	LHX9	DDA1	BTAF1
BIRC5	CACNB2	CARHSP1	NAP1L3
CDCA2	SMPD3	COPG1	ARHGAP44
CENPF	KLF2	SLC1A3	AQP9
LZTS3	TSPAN5	ARPC4	ZNF45
ECT2	HAS1	FASN	FRY
BUB1B	SPOCK1	PEX16	ARMCX1
WBSCR22	MEDAG	FLOT1	HSD17B2
CCNB2	SNX29P2	LRFN4	ST3GAL5
SMIM22	ANKRD29	BTBD2	SGCG
DLGAP5	MUM1L1	DRG1	PCF11
CXXC5	ADCYAP1	RNF19B	USP12
AURKA	PROCR	BCL7C	CREBL2
CASC5	SNCA	IDH2	ZNF175
FAM83D	DAPK1	TCEB2	TRAPPC11
TROAP	LGALS2	UBE2C	TSPAN5
RECQL4	C8orf88	JUP	ING3
BDH1	PTGIS	TUBA1C	SNCAIP
CCNE1	RYR2	CHD8	IL18
ESRP1	CNRIP1	ZNF593	SBSPON
SCGB2A1	SFRP1	GPR137	DPYD
CDC45	ARHGAP18	SMG9	PTGDR
C1orf106	ADH1B	MAP2K2	PTPRZ1
RAD54L	TBC1D2B	DNASE2	ME1
MUC1	IGFBP6	FXR2	SLC31A2
SLC29A2	HSD17B2	AGPAT1	TTBK2
KIFC1	ARX	TRAF4	NAP1L2
SPC24	AX747826	GCDH	SLK
SLC1A3	CCDC64	UBAP2L	PPWD1
PTTG1	HLF	FAM89B	UHRF1BP1L
CKS2	GPR133	CLDN4	GSAP
CDCA5	LRRN4	RELB	PLSCR4
LPAR3	ALDH1A1	DBN1	RAP2C
CEP55	PTGDR	TPX2	FEZ2
NCAPH	SLC30A4	MED25	TVP23B
EHF	HELQ	GSDMD	UFSP2
DEPDC1	CSGALNACT1	KDELR1	VGLL3
MKI67	PCDH9	DFFA	MCTP2
CBS	OGN	PIP5K1A	CSGALNACT2
TOP2A	CCDC68	E2F4	CHGB
BSPRY	CELF2	SDAD1	FAM13B
AUNIP	NDNF	LRP5	ITGAM
SLC2A1	PABPC5	NCLN	GALNT12
SYNE4	PDGFD	RASAL1	C2orf68
PYCR1	SLC4A4	KLHDC3	LGALS2
ARAP3	OLFML1	VWA1	MEIS2
EPHA1	MGC24103	TMEM161A	GFPT2
LRFN4	CHRDL1	HGS	TRIM68
AIF1L	MAF	HJURP	ATP8A1
ZNF93	DOCK5	ABCB8	XPA
LOC100287525	TFPI	HSPG2	PCOLCE2
ZHX1-C8orf76	PPAP2A	TOMM34	CELF2
HMMR	DOK6	SLC2A4RG	PROS1
SLC5A6	MAGI2-AS3	TOLLIP	LHX2
RMI2	PAPSS2	UBE2Z	PEX12
PFKP	IFFO1	MAP7D1	ZNF330
STIL	TMEM255A	RAB5B	CADPS2
PLAGL2	PLEKHH2	ERF	ERCC5
GINS4	AGTR1	MMP14	SEMA5A
CCDC88C	TMEM37	ASF1B	FRMD4B
AGMAT	LOC100996760	ARFIP2	ATF7IP2
GPR56	GNG11	PRAF2	MARK3
CRABP2	GHR	ADRM1	MTO1
ARRDC1	DSC3	PTPRU	CHRDL1
TLCD1	LHX2	GSK3A	PLCG2
ERCC6L	LSAMP	RELA	WNT5A
KIF15	RNASE4	SLC35C2	TCEAL2
HS6ST1	SYNE1	RAMP3	WWP2
FOXQ1	CDON	MICU1	DPYS
RUSC1	SERTM1	USB1	BCAR3
RAD51	RAET1E	MIIP	APPL1
POC1A	ZNF641	S100A11	FYCO1
FAM69B	HIVEP3	ELF3	SCTR
CENPI	SNCAIP	NCS1	MARCO
EME1	BDH2	SMARCB1	OLFML1
HGH1	STK31	ACTN4	DSE
APOLD1	PARM1	DNPEP	ZKSCAN7
EZH2	MAPRE2	ZNF93	ZNF37BP
CDK1	GALNT9	SNRNP40	PIGB
SLC4A11	ASTN1	BANF1	HERC1
S100A13	LYRM9	GPR56	GIPC2
UHRF1	ARHGAP44	HSF1	SLC16A1
CENPK	KCNT2	TSC22D2	WRB
CLPB	NELL2	FOLR1	ZNF573
PRSS21	STIM2	SPAG5	TRPC1
FANCD2	DOCK11	STOML1	ATG2B
XRCC6BP1	RP1-142L7.8	ARRB2	TFPI2
NEIL3	SMTNL2	MRPL4	RTN1
POLQ	GATA4	TINAGL1	CSTF2T
CDC25A	ME1	TRIP13	VPS54
OVOL2	GIPC2	HMGXB3	GPR137B
SGOL1	NPW	HMGA1	PTPRE
WSCD2	ZNF418	TP53I11	ADAMTS3
KIF11	SCTR	EFNB1	GCNT1
KIF23	INMT	G6PD	ZFYVE26
EMID1	PCOLCE2	CENPT	DAPK1
TES	KCNA4	NRSN2	RHOT1
DTL	RNF128	S100A6	HAND2-AS1
FANCI	CIRBP	CDC42BPB	PGRMC2
FOXM1	PPP1R12B	HIP1R	CLK1
ACVRL1	RTN1	RPN1	MTUS1
FAM181A	PMP22	CDCA8	PDGFD
MESP1	AQP1	C1orf106	C1RL
MTHFD2	ILDR2	SET	UBXN2B
PART1	MMP28	CIC	PHACTR2
ZNF672	FGF13	PPP2R5D	SLTM
LOC101926907	NAP1L2	GCAT	ZDHHC17
CENPL	L3MBTL3	KDM5C	ABCA8
UBE2C	FLNC	NR1H2	WDR44
CKAP2L	RAB7B	PRR14	TRAK2
RP11-108L7.15	LAMA4	MLST8	CTC-428G20.3
MELK	EPB42	DCAF11	8-Mar
PROM2	SLC31A2	SLC50A1	AKT3
CDT1	MAP3K8	ASB6	CRYBG3
IDH2	ABI3BP	UNC5B	KAT2B
FAM64A	RAB33A	RRP12	GCA
SKA3	PCDP1	PIGO	RNF38
DLL3	CRLS1	ADAP1	GLS
LRIG1	ATP10D	UQCRQ	HOXC6
HAPLN3	DISP1	HSPBP1	PHKB
DSCC1	TMEM8B	PTTG1	CXorf57
NCS1	MTUS1	RFNG	EFEMP1
FAM117B	CMYA5	PEA15	PNRC2
KLK6	RP1-78O14.1	PPP5C	ARHGAP6
SMAD6	ALDH1A2	BIRC5	ANKRA2
E2F2	SVEP1	SYNGR2	NANOG
FANCA	NPTN-IT1	PRR3	MPHOSPH6
PLK4	CMAHP	SORT1	SH3GL2
MON1A	PKD2	RBBP5	FAM188A
CBX2	FAM193B	ACTB	N4BP2L2
PSRC1	RAB8B	DCAF15	MST1
KIAA0101	SDPR	AGRN	RABGAP1L
PTTG3P	RP11-215H22.1	CLDN7	BBS4
U47924.27	SGCG	KIF4A	ACPP
HMGB3P1	S100A10	TAGLN2	GALC
FOXJ1	LGALS8	CCDC85B	HSD17B6
TBL3	DPP10	DGKQ	MBNL3
NUSAP1	NR2F1-AS1	RPS6KA4	TTC28
F12	B3GALT2	GBF1	MICA
CEP250	ZDHHC8P1	C15orf39	SWAP70
ORC1	RNASEL	YIPF2	ECM2
NOTCH1	CPED1	ERBB2	PITPNC1
STON2	TPP1	UBTD1	EFHC1
PVRL4	GABRB1	GALNT6	MMP28
KLK8	WSB1	FPGS	GHR
ARHGAP39	RP11-642D21.1	ZNF212	C3orf52
RNF157-AS1	AMDHD1	GPBP1L1	CDC14B
WNK2	BAMBI	RENBP	NRXN3
HIST1H2BD	PARVA	NT5DC2	SPAG9
MCM10	LXN	MYO9B	MORC3
SMPDL3B	AQP9	SLC25A11	NT5E
PRIMA1	ARHGEF10	BAK1	DENND1B
C1orf210	HOXC6	HIST1H3G	TACC1
PRC1	EMB	HYOU1	COL4A3BP
RNF40	MST1	OGDH	HNRNPD
SOX1	MEOX2	UBE2S	SVEP1
GPSM2	TVP23A	POLRMT	RALBP1
CCNA2	ANO5	SH3BP1	PAXBP1
VWF	PODN	GRWD1	KIAA0430
B3GNT3	SPRY4-IT1	SLC39A1	RAB38
DNMT3B	MYZAP	CFL1	HEG1
E2F7	SLC25A27	EIF4EBP1	MTUS2
BIK	LIX1L	KLK8	ARHGAP19
SAPCD2	BICC1	TRABD	HDAC4
RANBP17	LOC100134445	PRKAR1B	MAOA
INSL3	DNAJC7	POMGNT1	WDR37
ATP2C2	CLMP	PSD4	FZD7
APLNR	SBSPON	GLB1L2	BRD1
TRAF4	CTD-2035E11.5	NAB2	TRMT1L
EXO1	RPL23AP32	CDK16	RAPGEF6
TMEM92	LOC728061	SLC52A2	PARVA
LAD1	RAB27B	FOXM1	SFRP1
FXYD3	RP11-690I21.2	NES	RNF219
MRPL47	NLGN4X	NCAPH	RGL1
KIF20B	DDR2	PRSS8	MEOX2
TICRR	ANKHD1	KIFC1	FCGR3B
SFMBT1	NUMB	CAPN1	TMEM50A
C17orf53	FAM134B	FXYD3	CNIH3
MROH1	RP11-305O6.3	STIP1	CSGALNACT1
HMGA1	FCF1	LAD1	BMP4
ESCO2	IDNK	OVOL2	UBL3
TMPRSS4	IRAK3	SMG7	BICC1
SOX9	CHN2	MYBL2	SLC39A8
GINS1	SLC46A3	H2BFS	RAB11FIP2
FBXL6	NAP1L3	NEK2	TBC1D12
TBC1D7	MARCO	AAMP	CHUK
GALR3	PLCE1	ESPL1	IP6K2
CCNE2	CBX7	GDI1	AKAP11
ADPRHL1	EMP3	ITCH	AGA
LOC101928069	TSHZ3	CDC45	ATP2C1
RAMP3	SF1	MCM10	C17orf85
KRT78	ST3GAL5	CABIN1	TAF1A
LOC100288570	PTPRZ1	HPS6	PHF3
CEP72	YPEL4	FAM171A1	HAS1
C16orf59	CHD9	LRRC32	ISOC1
THEM6	PIK3C3	ERAL1	NSMAF
ESPL1	CSDC2	SLC39A4	PNISR
ZNF107	TMEM98	CCT5	PKD2
TMTC1	GPM6A	FAM64A	OGN
TMEM52	ADAMTS9-AS2	PDLIM7	FBXW11
BLM	KCNB1	NOTCH4	PCCA
ASRGL1	RECK	EPHX1	LRRC16A
GPT2	PITPNC1	COX7B	SERPINB9
GEN1	IL18	XAB2	DMD
DHRS13	FCN1	SORD	CDK8
CDC25C	DPP10-AS1	GYS1	CASP7
NCAPG	UGP2	CD82	CPE
CCNB1	PSD3	GMIP	NDNF
TMEM144	RP1-151F17.2	LTBR	RUNX1T1
RAD51AP1	AS3MT	PAM16	PAPSS2
MCM2	CCDC69	PRRC2A	HBD
CCDC64B	AX747507	PAX8	PYGL
PCDH1	LOC100506175	MAST2	CASD1
SLC25A5-AS1	KLHDC1	RHOB	DIRAS3
CLDN7	PLA2G2A	SLC44A4	ARHGEF10
FAM171A1	NPHP3	SYMPK	PARG
RASAL1	KIAA0226L	SRM	PPM1D
PPP5C	GATA6-AS1	CENPM	BMP2
TSPAN12	TBRG1	HN1	TTC13
KLRG2	SLC2A5	FAM193B	ATP7B
LYPD6B	POLI	ZER1	WASF3
ESPN	EZR	RANGAP1	SDC3
CHD7	LINC01279	CENPA	PPAP2A
GPM6B	ARMCX4	KIF18B	TTC37
DNA2	PAPD4	MRPS12	MED13
DAB2IP	ZNF385B	CDK2	TMEM9B
HEY2	DTWD1	STRA6	GSPT2
PRDM7	LRCH3	PRKDC	RASA1
LOC101928107	MGP	RHOD	ATMIN
LOC101928554	TLL1	LAMTOR2	NABP1
PKP3	ARHGAP6	PUF60	NEFH
MGC2889	CALD1	SREBF1	MPDZ
SYT13	ARNT	JMJD4	EML1
E2F8	KLF4	DRAP1	SLC35G2
SHANK3	RUNX1T1	RNPEPL1	BPTF
IPO4	KLF3-AS1	CCHCR1	FAM65B
OTUB2	AKT3	CYB561	FAM179B
PQLC2	PCDH17	MUC1	PTGER4
STC2	C3orf70	BCAM	HERC2
CDH6	TACC1	TRIM28	SNX7
ATP6V1B1	PRO2852	PAQR4	EP300
PASK	PLCL2	SPHK1	PIP5K1B
LOC643085	MINOS1P1	RBBP4	TLE4
SNTB1	ANG	CHIC2	MTM1
RALY-AS1	CYP2U1	SNRPC	WDR19
C6orf52	ZNF671	ISOC2	CCDC28A
PRKX	PTPRH	MCM3	GPR126
HMGB3	TDRD6	UBE2M	PKN2
SPRYD4	ECHDC2	BYSL	SPATA7
ADRA2C	RERG	AHDC1	TSC1
EPT1	MAOA	DNM2	ZC3H7A
TACSTD2	NKX3-1	MEX3D	ZMYM2
VWA1	TCEAL3	RALGDS	PLCL2
KIF14	SERPINB9	PPFIA3	GPRASP1
PTPRU	LINC00294	POLE	KIAA0368
CENPU	BBS4	TBC1D10B	SNCA
DCDC2	EFEMP1	FOSL2	ABCA5
KCNMB3	ULK2	PCGF1	VPS13C
SLC7A5	RBM43	FARSA	GLA
TMEM223	PEG3-AS1	MARCKSL1	MBP
RP11-96K19.4	PDPN	IPO13	CFI
NCAPD3	OMD	ING4	FBXO38
FAM111B	C1orf168	BLOC1S1	AMIGO2
PAK6	PBX3	KIF2C	RNASE4
LOC100131303	BDKRB1	UCP2	TAOK3
KLHL25	PRDM5	RAB8A	HECTD4
PRRG2	NANOG	KIF14	STXBP1
WISP3	METTL25	LRRN2	C4BPA
CC2D1A	PID1	YWHAE	RUFY3
SLC6A8	STX2	PKP3	TRIM13
RP11-692P14.1	TRPA1	AGPAT2	ACOT9
RDM1	CORO2B	UNC119	KAL1
FCN3	PAN3-AS1	RITA1	EPB41L3
MAD2L1	ZBTB20	VASP	FAM208A
RHEBL1	HSD11B1	OGFOD1	DIXDC1
LRP8	KBTBD11	PACS2	TBC1D2B
MYCL	LIN7A	CIZ1	SLC4A4
SH2D2A	FGF1	JUND	ZNF329
CEP85	FER	POLR2I	DHX29
HIST1H2AE	PTPRE	FOXRED2	CHST15
ZNF592	NTNG1	USF2	CCSER2
SORD	RAB11FIP3	PATZ1	KIF13B
HIST1H2AM	LOC401220	TOM1	SARAF
CDCA8	ZNF37BP	TUBA1B	CCNT2
GALNT6	UNC5D	FAM127B	SLITRK5
MTBP	BNC2	NFKBIL1	ZDHHC6
CAPN13	BACH2	STRN4	SACS
PPP1R27	P2RX7	ZNF430	RYR2
EHD3	FRAS1	PPP4C	TCF21
WFDC1	HHIP	MFSD10	BCLAF1
CAMSAP3	WDR17	GPSM2	SETD6
VAX2	VGLL3	RHPN1-AS1	ANXA3
PLEKHG4B	LOC100996412	SIPA1L3	CAND2
LRRC8B	LYVE1	SUPV3L1	MOSPD2
CELSR3	PIP5K1B	C16orf58	ATF1
GPR19	SPATA7	ZDHHC24	NFYB
ST14	CYP27A1	STT3A	CPVL
UBE2NL	MPDZ	CYHR1	CAV2
KCNK3	MBNL3	MID1IP1	GRAMD1C
SPC25	LINC00842	MLN	NR2F1
FKBP4	PPP1R3B	ABCD1	EHBP1
CLCF1	ARNTL	LINC00339	DCAF6
SLC25A15	MAMDC4	COL4A1	PTPN13
KIF18B	CAPN3	TTK	KIAA1598
BRCA2	ANTXR2	NCSTN	ALDH3A2
AMN	PHLDB2	1-Mar	SMPD3
VANGL1	SOX6	COL1A1	CCDC93
SPAG5	PCNX	TMEM74B	ALDH9A1
CDCA7	FLRT3	RFXANK	GNAI1
EPHX4	RP11-138I18.2	RUVBL2	HSPB3
C1orf74	DDX26B	SH3BP2	BCL2L13
UGT2B28	LOC100507311	YKT6	NKX3-1
KIAA1217	INTU	MBD3	FLRT3
NOTCH3	SEMA5A	TIMM17B	EPS15
TMEM61	GCNT1	GRHL2	MFF
C17orf96	SLC16A7	IRF2BP1	C6orf120
MBOAT2	CFI	SLC27A3	TMEM168
HSF2BP	MEGF6	VAMP7	APPBP2
GUCY1B3	CDC42EP2	ABTB2	PLA2G4A
GLDN	TSC1	LOXL2	TBP
P2RY2	CAV1	PPP1R14B	SLC38A6
METTL7B	C1S	ARSA	ZNF302
RAD54B	HYMAI	RPL37A	ATP9B
ATP4B	PPWD1	DXO	SART3
CCHCR1	PKHD1L1	CTNNBIP1	PER3
LOC101928222	BC035400	PPP2R4	PHLPP2
RP4-798A10.7	UPK3B	VARS	ADH1B
OLFML2A	MCOLN3	KLK6	ZBTB1
SPATA24	PGR	RNF123	SETX
COL9A2	NR2F1	LOC100288570	ADAM9
STOML1	SLFN11	TMPRSS6	IKBKAP
XDH	CADPS2	MOGS	FGF9
WFDC21P	FLJ35700	YWHAH	TARDBP
POLE2	TMOD2	SH2B1	PDZD2
PNCK	GALK2	SF3B4	CYP3A5
FBXW9	LIMA1	NR2F6	SACM1L
LRRC32	TRAPPC10	NUCB1	DKFZP586I1420
TIMM17B	SLC25A21	LYPLA2	EDEM1
RAP1GAP	NAV3	ZYX	LAMA4
LHX6	TLE4	CP	CCDC176
FOXRED2	CRYM	ESRP1	NR3C2
TBC1D31	ECM2	RP1-8B22.1	COX20
C17orf99	STX11	SOX9	USP3
HIST2H2BE	BMP4	MCM4	IBTK
LOC729870	GATA5	AURKAIP1	MIOS
LOC100289098	ZNF224	ZNF76	BTN2A2
MNS1	CAMK2D	HEY2	DOCK4
HID1	MTUS2	CCNE1	PIAS1
LOC100126784	LRRN4CL	B4GALT2	RBM5
CATIP-AS1	RGS4	RPS7	KBTBD11
DUSP9	MUM1	PLVAP	ZNF304
RAB26	RBMS3	RGS14	CASP4
S100A2	MOSPD2	ZC3H3	TSPAN13
DERL3	PRICKLE2	MAPK7	TMX4
SLC25A33	MST4	POTEKP	GALNT11
MTFR2	STARD9	MYBBP1A	TBC1D4
KNSTRN	SLC9A3R1	RNF208	NEFM
MTOR	NSUN6	RASA2	DPY19L2P2
SLC6A12	TNRC6A	GTF2IRD1	INSIG2
DEFA6	VAPA	MSL2	B3GALT2
KIF18A	LRRC37A2	RAD9A	TFPI
U91328.2	PEG3	ZMAT5	DDHD2
TK1	LINS	AXIN1	MPP6
RAB3D	NBR1	PDAP1	TSPYL1
NES	DIXDC1	TOMM22	RGN
PIGQ	GSTM3	SLC9A3R2	ASH2L
POM121L8P	LOC101928230	HOMER2	PGM3
PKMYT1	COLEC12	JUNB	ALDH1A1
SMYD5	SIGLEC11	THOC6	NTAN1
AURKB	CYP39A1	ERH	IK
ARHGAP27	TRA2A	PCYT2	ROCK1
GDF11	DHRS7	PDE9A	FGF1
CDKN3	EPB41L3	SF3A2	NR0B1
PIF1	RP6-24A23.7	LMF2	PEX7
HIST1H2AJ	RP11-680F8.4	HIST1H2BE	BACH1
CASKIN1	FOXP1	SLC22A14	LANCL1
BCL11A	CRIM1	KIF20B	RUFY1
WRNIP1	LOC100130232	SMARCD1	PDPN
MLN	FLJ38717	ERI3	TRIM5
LOC100507670	PTGER3	RTN2	SEC63
C12orf56	CCDC80	MT1G	GPATCH8
SPATA31E1	CFD	ZNF444	SYNC
TRIM62	RBFOX2	PA2G4	SOBP
NUP50-AS1	CPEB1	INPP5J	PTGER3
CSPG5	MARS2	MKI67	GOSR1
LOC100506679	DSCAML1	CAMK2G	IGFBP6
UBAC2-AS1	AASS	DTL	LRRC1
SYNDIG1	NR0B1	MCM2	PDZD8
HIST1H2BH	STAMBPL1	PRKAR2A	KIAA0355
NIPSNAP1	YPEL2	L1CAM	HPS4
ST6GALNAC1	WDPCP	FBRS	DZIP3
UBE2T	RP11-173M1.8	NOC2L	PDGFC
CCDC124	CNTN4	EMID1	CMAHP
NAV2-IT1	FAM155A	UGT2B28	INPP5F
TSPAN17	RP11-138I17.1	TELO2	FBXO3
RAB20	RP3-508I15.21	ATN1	BACH2
HECW2	DSE	RNF40	TJP2
SASS6	IL6ST	TPRA1	FAM8A1
JAG2	SECISBP2	RXRB	ATRX
KAZALD1	CCDC84	GIPC1	TLR2
OR7E14P	DPYS	RRBP1	ANKRD12
MPV17L2	TMEM150C	TMC6	HLF
C9orf16	FLJ31306	CD300C	DPYSL2
RACGAP1	MTURN	DCTN5	PRKAR2B
RP11-118G23.2	FAXDC2	CHPF2	DOPEY1
EFNA3	ADAM33	SCMH1	FBXO9
NEURL3	NR3C2	YPEL1	IL6ST
HES2	RP11-319G9.3	EHD4	H6PD
NTN1	SSBP3-AS1	FUZ	CHD9
MB	HSPA12A	SOX13	DCUN1D4
OR7E12P	SYNPO2	TPI1	SUPT7L
CRYBB3	CLK1	CELSR3	ARMC8
TMEM201	RAC2	TEAD4	IL16
HOMER2	CCDC158	OR7E156P	C2orf42
AP000525.9	TPBG	GINS1	PIK3C3
MCM8	ABCA5	AURKA	ALDH1A3
ZNF296	PDZD2	COPS7B	ATP11B
LOC150051	RP11-499E18.1	BCL11A	LIN7C
MMP7	SEMA3C	RPP14	RUFY2
CABLES2	STRADB	LZTS3	CBX7
GAS2L3	CXCL6	ECE1	ZNF211
DARS2	RBM5	NMB	SCG5
FBN3	NPTX1	LSM4	REV1
CLDN10	HVCN1	PKN1	OSTM1
SH2D3A	LOC145474	PRDM11	MEIS3P1
CNP	ZNF211	STX10	ICE2
SLC44A4	KLHDC8A	AP1S1	NUDT9
GEMIN7	SRSF4	MDFI	RAPGEF2
STK16	STAR	ANAPC2	LOC728392
ADORA1	KIFC3	NFKBIB	KBTBD2
RGS1	MTMR9	FANCA	UIMC1
RNASEH2A	LPXN	ASS1	WDR47
SCRIB	RP11-324L17.1	ARHGEF2	TMEM5
NOC2L	KCNJ8	PSMB2	DCP2
ZNF138	MAN1C1	ARF6	MDFIC
LOC102723864	ZFYVE26	DGKZ	PCSK5
MPP7	LRP2	IL32	ZNF415
TFAP2A	NBEA	MYL3	STX2
EVA1A	GSTA4	CST4	HSD17B11
ERV3-2	KATNAL1	MMP17	ZNF83
PLK1	GAS1	CLSTN3	PCNXL4
JMJD1C-AS1	PAPLN	RAD23A	GREB1
SULT1C2	KPNA5	TGFB1	LXN
DDIAS	FAM13C	TFEB	SYNRG
PCNXL3	HOXD10	RALY	CCDC68
AOC2	PTRF	SH3GL1	BAMBI
LINC01138	HSD17B6	FAM53B	DPP4
UCP2	UFSP2	TK1	TASP1
SLC30A2	CBLN2	GALR3	MCOLN3
LINC00491	DOCK4	RNF167	VAMP4
MTL5	RP11-454F8.2	CLCF1	RBL2
LINC01208	SERPINB6	KXD1	UFL1
TTC39A	TXNIP	LSR	FNDC3A
LOC389641	SESN1	GPS1	MET
WDR55	CCND2	SDC1	SEH1L
TONSL	CNIH3	FUT8	FAM192A
FMN1	TRPC1	PSRC1	BDKRB1
CXorf31	C20orf194	PARVB	ANKRD10
GPR39	FAM178A	DCTN1	HMGCR
SMC4	AKAP10	ITGA5	SH3BP5
RRP12	OSTM1	NRBP1	ZNF587B
FAM81A	DNAJC27	SRCAP	SFTPD
H2AFX	LOC100128325	VAMP2	VWA8
CELA3A	SSTR1	TARBP2	ZBTB18
SIX4	TSPYL1	ASPSCR1	PROSC
TYSND1	HSDL2	CDC25A	ZBED5
TP53I11	FRY	TAF15	LYVE1
LOC101927929	ZNF175	CX3CL1	7-Sep
PI3	PRKAR1A	PRKCD	SLC35A1
BCRP3	RASSF3	SERTAD3	ATP7A
MRPS26	CRYL1	SARS2	TNFAIP8
HIST1H2BC	CCDC28A	PECR	NPR2
C1QTNF9B-AS1	OSR1	HDAC7	SEMA6D
DLX5	PARP8	BSPRY	PALMD
PDCD2L	RFPL1S	MRPL12	MLH1
NCR2	MCC	LIME1	ECI2
GSDMC	CTC-471J1.2	BIK	KCNJ8
ANGPT2	THAP6	CBS	ADO
KIAA0040	MON2	RPL38	PODXL
LMNB1	SDC3	FKBP4	PRKAR1A
NOTCH4	REPS1	OXT	AKAP7
RANGAP1	ZNF540	ALKBH4	AFAP1
IGFL1	CPE	U2AF2	YTHDC2
GJB3	ADAMTS3	CSNK1E	CAV1
SLC7A1	PLCL1	EIF5A	HS2ST1
GYLTL1B	FTX	CKS2	RGS4
USP18	C10orf54	LHX6	ZNF106
FMNL3	RP11-506O24.2	STYXL1	FUBP3
C5orf22	SEMA6D	CD320	GATA6
KCNC1	ZNF225	HIST1H2AB	EPB41L4B
HIST1H2AB	USP27X-AS1	GADD45GIP1	ATXN1
CHRDL2	CASP4	RRP7A	CAPN2
ADRBK1	SYNC	BRMS1	STXBP3
BCL2L14	ARMCX1	TSKU	TPBG
SPDEF	RP11-1103G16.1	PYCRL	DAAM1
ZWINT	CFH	RRP9	RBPJ
IDH1-AS1	BBS12	PPP6R3	BDH2
KCNQ2	CYP3A5	BUB1B	SHQ1
SSUH2	HEG1	IDUA	TMEM8B
REST	TEFM	POU5F1P4	PRKD3
HIST1H1E	GLS	PRICKLE3	THAP9-AS1
DTYMK	ZFPM2	S100A1	THBD
CACNA1S	PTPN13	LPPR2	GLIPR1
CCL11	EFHC1	COL7A1	EID1
PRKCD	ZEB2	MAP3K11	CAP2
JPH2	LINC00936	IL1RL2	FCN1
MAP1LC3B2	PLA2R1	RECQL4	ANKMY2
TCP10L	SLC16A1	NAT6	RNF103
SYT11	KITLG	POLE2	TIAM1
OXNAD1	SYT1	PCIF1	IVNS1ABP
MYBL2	PLXNA4	MAPK3	PURA
MBLAC1	LINC00355	TIMELESS	FAM69A
UFSP1	CERK	TSTA3	TSPYL4
LOC440028	DDX17	LAS1L	FANCL
C7orf49	HPSE	TUT1	ACSL3
USP28	WNK4	MCF2L	COLEC12
SVOPL	CASC7	COL4A2	RALGAPA1
DHTKD1	DPYD	MPDU1	GNG11
RP11-457I16.2	SREK1	C16orf59	CFH
CENPM	QKI	DDX11	KLF3-AS1
CLEC14A	CALCRL	MMP15	NLGN4X
IRF6	MYO15B	TRAPPC6A	IRS1
MAP4K1	ZCCHC24	C20orf27	TNKS
IKBKE	SBF2	HDHD3	CDC27
CLDN2	BST1	RUSC1	NAV3
HMCN2	TRIM6	SZRD1	IFFO1
POLE	TSPYL2	BRF2	CUL3
HAGLR	AHI1	POLR2J	PHF21A
FAM174B	TENC1	ACAN	COL4A5
PATZ1	ITM2A	CCNB2	IRAK3
NR2F6	PTPRO	MCRS1	NCOA4
CX3CL1	RAB30	BAHD1	WDR7
LINC01181	ATG14	RNASEH2A	KDSR
MFSD3	TMEM91	ABCD3	DLG5
HIST1H1C	SPTAN1	COMMD4	PCDH17
BRIP1	TRIM68	RAD1	ZCCHC8
UBE2O	GNB5	PDE6B	NOL7
OCA2	VSIG4	PIGR	INPP1
PALM3	FCGR3B	ISG15	CROT
OR7E37P	SLC9A9	SCAMP5	VPS4B
ZNF787	CARNS1	CRIP2	TPD52L1
LOC102724362	AKAP11	ARAP3	SYNJ1
CHODL	DYNC2H1	STX1A	FAM13A
LYPD1	RAB38	CBLC	MRPS14
MUC2	ZNF274	NOP10	CLEC10A
SLC20A2	LOC100505915	INPP4A	MTMR9
ATAD3B	RBM6	CDKN3	MEF2C
TAS2R3	SPAG9	TRPM2	MIS12
CMTM8	PCSK5	ZBTB7B	SF1
NEURL1B	ARHGEF26	ARHGEF11	HOXA1
DOCK9-AS2	HSPB3	PPP6R1	EPB42
PRSS3	AHDC1	COX6A1	SRP54
YWHAEP7	FOXP1-IT1	PKMYT1	VIPAS39
CAMK2B	GPR137B	ACTR1A	RCHY1
CLDN19	TLR2	PRCC	C2CD5
ZNF552	DCN	NOP16	DNAJC24
ORC6	PRRX1	HIGD1B	PJA2
C19orf45	SLIT2	RMND5B	HSDL2
SLC5A10	CTB-181H17.1	P2RY6	MYL12A
CTB-92J24.2	EFNB3	DNAJC17	ULK2
PPP1R14D	CYS1	SMU1	PER2
LINC00293	CASC4	TROAP	TRAF5
SEMA3G	MYO9A	SKAP1	CROCCP2
CTD-2256P15.2	POGZ	UBE2H	BNIP2
RRM2	FBP1	INPPL1	ERC2
OR7E47P	RARRES1	FAM174B	VLDLR
SLC34A2	PNISR	KLK12	HNRNPDL
KSR2	FYCO1	WBSCR22	GLT8D1
KIF5A	TLE2	POR	KIAA0226
LOXL2	BBS2	PRSS22	TXNDC15
TNFAIP8L1	RUFY3	MINK1	SPRR2B
FJX1	FBXL7	C9orf114	CIRBP
CYB561	CNTN1	DAGLA	KIF16B
STX1A	LOC100272216	SMYD5	TEFM
TMEM79	TCERG1L	ACTN1	SEMA3C
LCN2	ERN1	NFYA	HEBP1
VTCN1	GLI3	EPHB2	RABGGTB
ASH1L-AS1	LRFN5	SCD	CETN3
CHRNA5	TEF	PLD3	KHNYN
C8orf4	RP11-271C24.3	NIPSNAP1	LUC7L3
KCNG1	N4BP2L2	HP1BP3	GTF2H1
SC5D	FAS	PFKP	KATNA1
ABCA2	NEDD4L	ARHGAP33	MS4A4A
CELSR1	MPP1	CPTP	CAST
MYB	CLEC10A	PRSS3P2	GATA4
CENPN	AQR	PHEX	ZNF274
SOX5	ATRNL1	FIBP	ZDHHC14
SDC1	FECH	TACC3	PHACTR1
SERPINB3	AGAP9	NFKB2	ZCCHC10
KCTD1	SYNE2	MFGE8	ZFPM2
GJB1	LOC728392	PLAC1	ATG14
CSNK1E	NEGR1	IKBKG	SAP18
CD207	MED6	CDK1	C3AR1
ARTN	CYSTM1	UBE2O	CBR4
PIPOX	DST	TARBP1	SON
MYO10	EBLN2	UQCR10	FERMT1
FZD10	GABARAPL1	SUPT5H	DNAJC8
IL25	ARF1	LIMK1	DET1
BAIAP2L1	MALAT1	RAD54L	ADRA2A
MEX3A	C5	NUSAP1	THUMPD1
KIF1A	TSPAN8	EVA1B	WSB1
ESM1	RNF146	TRAPPC9	GMFB
ZNF367	PRKD1	SLC29A1	ANKRD36
ORAI2	SIGLEC16	TMEM11	ZNF451
TCF19	ELP2	HNRNPL	DMXL1
SLC5A1	LIPA	PBXIP1	DPH5
RP11-502N13.2	ANAPC4	BMP1	LIPA
GDPD2	SPATS2L	UNC93B1	PIGK
XYLB	TIMP1	CALU	TOR1AIP2
CRTC1	LOC286161	NDUFV2	MED13L
ABHD17C	FGFR1OP2	KIF20A	MUM1
KCNJ6	CLIP4	TFAP4	KLF11
CENPO	SLC39A8	PML	SDCBP
EDN1	NFKBIZ	KIF26B	ZNF529
SLC35F2	GLIPR1	JAG2	GOLM1
PRSS2	LOC100129406	SCGB2A1	TOB1
TSNARE1	TMX4	GPSM3	ALAD
LINC00280	INTS10	CDK2AP2	ZNF226
MED12L	PLSCR4	ETV6	AP1S2
AC141928.1	STX8	SLC6A12	HSPBAP1
RBL1	TMEM176A	KIAA0101	PAQR3
GPATCH4	HPR	STK11	MON2
HYAL4	CREBL2	TBXA2R	FBXL2
PDHA2	WASF3	USP5	SLC9A3R1
DNAJB13	LOC100286925	PAGR1	ADH5
AWAT1	TPD52L1	KIF22	SCAMP1
TACC3	SPRR2B	SUMO4	AGTPBP1
LGR6	NDN	CSPG4	KCNJ2
LOC100132207	NGF	OR7E37P	HNRNPA3
MYH14	TLCD2	GJA4	JADE1
MAPKAPK2	ARRDC4	ADRBK1	NDUFA5
SHBG	SHC2	PDIA4	SETMAR
PRKCQ	PDLIM5	C1orf112	PIEZO2
L1CAM	PTGFR	TNFRSF12A	CCDC109B
CCDC150	TNFRSF8	FLAD1	LSAMP
BARHL1	DKFZP586I1420	DOCK6	AGL
LOC100505835	KIAA0485	RNF122	HECA
ADAMTS14	CUX1	S100A2	MCMBP
NT5DC2	KCNK6	DCXR	ASB8
CENPA	LOC102724312	CHRNB2	SNX1
SKA1	NPL	KCNH2	NR3C1
GCAT	TFPI2	GABPB1	TRAPPC10
LL22NC03-N14H11.1	ATL1	TAZ	ASPA
CIB3	ATXN1	SHC1	STX12
CKB	STK32B	RHBDL1	HSD17B4
SLA2	CALCOCO1	CLN6	C1GALT1C1
HILPDA	TOR1AIP2	ZBTB22	THG1L
SPATA19	PDGFRA	PLOD1	CMAS
RP11-554J4.1	SEMA6A	FJX1	ITPR2
STRA6	PROS1	TECR	ROBO1
PGAM5	C14orf28	PNPLA6	RRN3
SPHK1	SAT2	CACNG4	RCBTB2
SLC37A1	NKTR	CDT1	OSBPL1A
WDHD1	EPG5	HIST1H1C	ST7L
DNAH14	SLC25A37	CIB2	AZI2
PNO1	SERPING1	CHD3	CYTIP
AC003989.4	MED13L	KCTD20	ZNF395
FOXN1	CASP1	TOP2A	CACNB2
ITPRIPL1	ARHGAP28	WDR62	SCP2
OXT	TNFSF13B	AC074212.6	RP5-1118D24.2
PLAG1	EPHB6	ATG101	FBXL7
ETV4	RGS18	GPX2	CERK
MBD3L1	EMILIN2	GTF2H4	CHMP2B
FAM132B	ID3	TMEM222	OAT
MARVELD3	TRAF5	CBX4	RWDD3
SDS	MEF2C	PRSS3	PRKACB
GPR158	TMEM200A	DTX3	NEK9
SERINC2	LOC100190986	CHMP6	FBXW2
MMACHC	LYST	NPEPL1	PIK3R4
IQCH	ZNF23	SIRPA	SORBS2
FTCD	TMEM176B	MDK	PTCH1
NPTXR	LINC01116	UAP1L1	APIP
SYNPR-AS1	HSPA2	ATOX1	MPPE1
ASB10	FGF9	MISP	SPAG16
RHOF	TDRD10	RAP1GAP	PBX3
PSD2	RUFY2	SLC43A3	UPK1B
DOCK6	DTNA	PLAGL2	DHRS7
ACOT8	GFRA1	PRKCI	NME7
LOC101927701	FGF2	ASRGL1	BNC2
JPH1	FAM221A	MT1X	FGL2
NR1I2	FBXO9	DGCR9	HPSE
GPR68	ZNF516	HIGD2A	SPG11
CCDC58	SCARB2	CREB3	SEC24B
LOC101928000	PRKAR2B	TUBB3	EPS8
MYLPF	CPB1	SBF1	BIRC3
INCENP	APOBEC3C	ANAPC15	KCTD9
GABRD	CTIF	HIST1H2AJ	ZBTB20
LOC100505902	ALDH1A3	LSM7	CHORDC1
AK130486	ZNF300P1	KIAA0319L	CPB1
CCDC167	HNRNPA1	MXD3	MEGF6
LINC01206	TSPAN4	HMMR	CUX1
PGD	PRR9	DLGAP4	PNMAL1
RP1-155D22.2	CPNE8	CDCA4	CYFIP1
CSMD2	RGS2	CENPF	PLIN2
KCNJ9	PDE7B	PEBP1	FEM1B
GOT1	DEFB132	UBA1	EVI2B
WDR72	TTBK2	CPSF7	CAB39
OVOL1	CA3	CLDN9	WDR11
CPA2	FAT4	PAK4	PEX1
DEPDC1B	SORBS2	CKB	RSRC1
ATAD3A	RAB31	PRDM16	MYOM2
SIKE1	TXNL1	QTRT1	SYNE1
CASZ1	CPQ	BDH1	DIS3
S100A1	SOBP	TRIM17	ASPH
FAM222A	C15orf57	GLTP	RFC1
C15orf62	CSF2RB	PTPN6	LRRC49
FBXL19-AS1	SELL	REEP2	POLI
IRAK2	HNMT	RGS19	FBP1
RHPN1	HBD	PLK1	DRAM1
KRTAP5-9	METTL14	ANGPT2	CSNK2A2
TMPRSS13	C1RL	TMEM160	TM2D3
HN1L	GALC	GDPD2	PSMC2
LOC100507468	DRAM1	EXOSC4	AGTR1
RBM38	EPS8	SH2D3A	ZNF200
DLG5-AS1	ERO1LB	TRPC4AP	CHST3
ANO2	TEP1	SLC29A2	YTHDC1
NEK6	SH3GL2	INHBB	PCYOX1
CATSPERG	SLC35G2	2-Mar	AK6
SCLY	IFNGR1	CDK5	RAP2B
POU2F3	LOC100133039	CCNA2	ACSL1
SPSB1	CTSO	FANCI	USO1
SLC30A3	UBE2D3	TRMT61A	SGMS1
KLHL40	ZNF395	SLC25A10	FUT4
B4GALNT3	AFG3L1P	PPP1R37	RIOK2
RP11-214N1.1	SND1-IT1	SOCS3	UPF3A
PREX2	ZMAT3	ZNF467	FAM134B
GLDC	ACAA2	CDC25C	GOLGA8N
PRR30	ETNPPL	DLG3	KIF13A
XPR1	CHKB	LCN2	PPM1B
VRK3	COL6A6	OIP5	ATP2B1
SLC5A2	RPS27	HMGB3	SLC16A5
PMCHL2	ELAVL2	CIAO1	SLC30A5
PRO1082	LOC100507557	NAP1L4	ARNT2
LRRC20	TRIM23	THOP1	OMD
ANKRD16	CA11	CST5	GAREM
OSBPL10	CPVL	MKS1	FOXJ3
TRIM42	ZFYVE16	SLC5A2	CSF2RB
PCDH19	GNG12	DCAF7	CEP192
RABGEF1	LOC102725017	SCAND1	EZR
TNFAIP2	BC015159	CRTAC1	HSPA2
LOC100505774	EFNA5	POLR2A	DCTD
ZYG11A	MAOB	CDKN2D	FCF1
NIPAL4	HDDC2	MCAM	RNASE2
DSCR4	CTC-429P9.3	RAB1B	TBC1D8B
ECSCR	EOGT	IMPDH1	INSR
RNF32	DMD	FBXL6	SHROOM2
CDC6	CFL2	TAF6	DPP8
SFN	PHACTR2	LMNB2	SYBU
CACNG1	RASSF8-AS1	WRAP53	TXNIP
PEX16	CTNNAL1	FAM86C1	IL1R1
LA16c-381G6.1	ANXA1	TRMT2A	EZH1
CNGB1	SLC44A1	OAZ2	METTL3
C5orf34	FEZ2	SUV39H1	TMA16
HEYL	MARK3	TSC2	ZNF189
RP11-425D10.10	TAF9B	ARMC7	UBA3
VIL1	H6PD	TRIP10	ARL8B
RGCC	KAT2B	CAPG	MAOB
MESP2	CD28	CDC42EP1	SRSF11
KCNN3	ETS2	AIRE	AMPD3
MAZ	ALOX15	PSMB3	CYLD
C19orf44	LPAR5	VWF	RCBTB1
BCL2L12	TMEM151A	RACGAP1	CTSL
AC005537.2	DENND5B	CRTC1	KLHL20
NR1I3	METTL7A	TMED2	ZC3H14
LINC01153	LAMA2	G6PC3	UTP3
LOC101926987	HCRP1	XCR1	NAA16
DNTT	SLC16A4	ORAI2	KIZ
CLCN4	ATG2B	KLHL12	IMPA1
LINC00964	IST1	RCN3	CLCN3
NOP2	SCARNA17	TUBA4B	CFHR2
DGKD	GK	DNASE1	RB1
LINC00269	TCEAL1	GNB1L	TPP1
RP11-510C10.2	C4orf29	ARHGEF16	ANAPC13
NDC80	TMEM2	GPR132	UBR2
LOC81691	KGFLP2	BACE2	ASAH1
B3GALT1	KIAA0430	PTP4A3	NSA2
TTC22	TJP2	ACTL8	TSPAN8
KLRG1	S100PBP	PRC1	CCBL2
MAP3K10	RP11-468E2.5	ST14	IFT88
LOC101928269	LRRK2	ITGA9	IFI16
LOC100130111	H2BFXP	CAPN11	BBS9
HMGA2	DCUN1D4	C11orf68	HNRNPA1
RP1-228H13.5	MGEA5	MED8	NCF2
MTG2	LOC100506282	ARHGDIA	ZNF230
S1PR2	NFIA	ACOT7	DNAJC12
YEATS2	ATP7B	RCE1	MEF2A
SHISA9	MORC4	DRG2	RORA
HAGLROS	GOLM1	STXBP2	PPIP5K2
ITGB1BP2	MLXIP	PPIF	RAD17
TERT	ABCA9	ALDH1B1	NEK7
FAM124A	TTC13	RGCC	NAT1
RAD18	PTPN21	COL5A3	PIP4K2A
LOC400548	FAM65B	C22orf24	SERINC1
LOC728485	LOC286437	EMD	CASP1
DRAXIN	CFDP1	TUBA4A	TYW1
TAF6L	DCLK1	SMAGP	FTO
CCL20	ANXA3	BAG6	SLC30A9
C2orf82	SLC41A2	ITIH4	PRDM10
CCNB3	HHIP-AS1	SIVA1	RAP1A
PZP	WNT5A	FASTK	ELP4
CCKAR	NAIP	ADORA1	SYNE2
AFF2	ZNF697	WDR77	OARD1
LINC00958	ATP1B4	PIGQ	AFF1
RP11-329B9.3	ANXA5	LIPG	HBB
KCNIP3	BTAF1	MTHFD2	PNPLA4
SCGB1D2	CDC14B	DNAJB1	NGLY1
FLJ41455	EIF1	SLC27A5	DOCK2
HM13	TMEM220	CHCHD2	KLF10
NDST1	ABCA6	TOMM40	DIAPH2
PAQR4	ZNF615	EXTL1	TTC27
FLJ31104	ZNF302	P2RY4	UBE2D1
TRIM24	CLASP1	MARK4	TGFBR2
HIST1H4E	PJA2	HIST1H2BH	METTL7A
C11orf84	TIMD4	PACSIN3	ZNF266
ADAM7	UBE2I	C11orf24	PMP22
LINC00884	GTF2H2B	SLC20A2	YME1L1
KCNH2	FAM69A	MUTYH	MED4
LINC00408	GYPC	FLNA	RNMT
ABCD1	TNNI3K	IFI6	LEPROT
AK131021	LONRF2	DEAF1	CRYL1
SRGAP3	FRMD6-AS1	COQ10B	PTGIS
PCDH7	SCN7A	SSNA1	LINC01140
HIST1H2BE	CTC-428G20.3	CDKN2A	RNF111
PRRX2	FXYD1	MT1HL1	RETSAT
RPL13AP17	NRXN3	AKT1	UNC119B
TIMELESS	LAMB1	TLN1	FIP1L1
CXorf36	ITGAM	COX5B	HTATSF1
KDM4D	ATP6V1B2	GPR157	SKIV2L2
ORAI1	SCN3B	ENDOG	PLCB1
TMEM51-AS1	PDK4	GLDC	SMAD2
TSPAN15	LOC101927752	ZNHIT2	PTPLA
CHEK1	ZDHHC17	SNTA1	MAGI2
OXTR	BEX1	GJB1	SIRT1
UNC79	AK021804	POLD4	NPL
AC104667.3	FABP4	GPRC5C	FAT1
ZNF492	KRR1	S100A3	TXNRD1
TMPRSS6	SERP2	ACTR1B	BRAP
PITPNM2	PHLPP2	HIF1AN	RBM26
RCC1	F13A1	MEA1	SLC7A7
MCF2L	GATM	WBP2	AMMECR1
RNF19B	DENND4A	TAGLN	CCDC47
TRPM2	WNT16	NFYC	NDN
ARHGEF39	RP11-38P22.2	DNA2	EMC2
TBC1D21	NFIC	GRIK5	PIKFYVE
ADAM11	ZNF546	NDRG3	WDFY3
KRT23	FAM46A	SGSM3	KIAA1109
FZD9	IL15	FLOT2	CLIC5
CD34	MICAL2	CARM1	FBXL5
LINC01121	SMAD9	AIM1L	ENTPD4
FBXO27	POLR3GL	ARPIN	CLK4
MAL	SLC35B4	TRAF2	ETAA1
OIP5	ENOX1	HDGF	NPTN
CLN6	RP1-102H19.8	KIAA0040	DYNC1LI1
LIMK1	VLDLR	AGRP	ABAT
CA8	AGA	NAA10	NPTX1
APBA2	C9orf38	SHARPIN	LOC202181
TMEM125	ERMARD	PCDHA2	FAM114A1
CEACAM4	TAF1C	AP1M2	AGGF1
PRKAR1B	LOC142937	ESRRA	ARFIP1
FAM71F2	SGK1	SLC12A9	MUT
TNNT1	MED17	HPX	MSRA
IGHD	EZH1	BAP1	WDR41
BC079832	ARHGAP21	GGTLC1	NBR1
PIGO	GLT8D2	CDC42EP4	TBC1D22A
GSG2	ZFAND6	TBC1D17	NACC2
MICALL2	NFASC	SMC4	THAP1
PYCRL	GNPDA2	TUBB	KDM6A
LOC285627	MFSD4	BUB1	BST1
C21orf90	RP11-216L13.19	ATP6V0B	CEP83
CIB2	SPARCL1	ATP6V0C	PID1
LAMP3	PTHLH	DMWD	OSBPL9
ZNF165	ELMSAN1	SLC25A1	SMARCA2
ZBTB42	AIF1	EML4	ACSL5
RP13-436F16.1	DNAJB4	ABCA4	PLXDC2
OR7E104P	HSD17B11	CUL7	FBXL4
EGR4	CDH11	SRC	HADHB
C9orf114	NHLRC3	CDC23	SOCS5
WIZ	SULT1A1	DLGAP5	NISCH
TREML5P	SEMA3D	CENPB	DZANK1
PRL	C4orf32	GGCX	PPP1R3C
CCM2L	TTC14	TMPRSS4	HSPA12A
GLRA2	LINC00597	THEM6	TMEM104
GTSE1	LATS2	ATXN7L1	SUCO
OXGR1	KLF9	IRF3	RARRES1
VPS52	LMBRD1	SLC43A1	IGBP1
PTH2R	SFTA1P	ZNF672	ZFYVE16
FSD1	SNRNP200	APEX2	CDK17
LOC340357	PIP4K2A	CDC34	IQGAP1
MREG	KNG1	CREB3L1	ZNF223
TCP11	CLDN11	KHSRP	ZNF224
FGF6	DSERG1	GS1-111G14.1	ZFAND6
CXorf58	FHL1	MFAP2	CSTA
RP11-61L19.2	PRKACB	AGPAT3	NPEPPS
ZNF644	MDN1	SIRT6	CRNKL1
APOA5	GPR34	BLM	CDC40
WNT7A	NR2F2-AS1	SPHK2	ACACB
LOC100130502	RAPGEF4	SLC25A40	UBE2W
FEN1	EPB41L4A-AS1	PIK3R2	CDCP1
FLYWCH2	WDR19	SPC25	ELF1
YDJC	ANKRD10-IT1	TBX2	RAB21
TMC4	CBR4	NEIL3	ENOSF1
LOC102723493	HOXD8	PDGFRB	FOXO1
BLK	ACADL	CDC6	CHN2
SLCO2A1	MEG3	IL21R	SEL1L3
ZRANB3	ATP7A	MLF2	RPGR
KIR3DS1	SNAP23	GLUD2	SPG20
TCL6	TNFSF14	MTX1	SH3BP4
BMP8B	PLXNC1	SOX12	BBS1
ITIH2	MSRB3	TMEM115	COBL
ABCA4	DNAJB14	PDCD5	HDDC2
LOC100506457	LOC100506563	BGN	VSIG4
C11orf83	CREBRF	GEMIN2	VPS13B
LOC101927539	GNG2	CSK	SLC2A5
FAM90A1	SMAD4	HCFC1R1	TLR1
SAC3D1	KLHL4	CLIP2	ZCCHC6
APH1A	ARHGEF7	STARD3	ARNTL
MRPL12	SNORA21	GAPDH	TBC1D9
ADCY1	ROBO3	PC	ANXA4
GRIN2C	OPHN1	PNPLA2	ARMCX3
CHRNA4	SMARCA2	COL18A1	GGNBP2
ATP10B	PRR15	ADA	YPEL5
CDIPT-AS1	ZNF266	SEC24C	LEMD3
GLOD5	CLK4	SLC2A1	WLS
LINC00535	S1PR1	ITPKB	CDC16
S1PR3	PP12719	RPL36	KRBOX4
KLK12	TBC1D4	CST2	EIF4B
RRBP1	BCL2	S100A4	HP
ASB6	JAK1	PLCG1	SMCO4
TSPAN11	RBPMS	NDUFA3	ZNF7
KCNQ3	MS4A4A	HMGB3P1	ISL1
NAIF1	ZNF106	SMTN	SP2
HIST1H4D	MRGPRF	FUCA1	RHOBTB1
CDCA4	ERC2	RAB5C	STK32B
CLEC4F	RGL1	DPYSL4	ITSN2
PADI2	FCGRT	LINC00963	SLC25A36
TRAIP	DDX42	BTG3	ALAS2
TCEANC2	FTO	MRPL42	TRAPPC13
CHTF18	ATP6V1D	GRIP2	PIN4
EFCAB4A	LUC7L	HRH2	SUN1
POLA2	PRKCDBP	BMX	MAP3K4
PNKD	DPY19L1	POLM	SLIT2
RP11-540O11.1	JAK2	SP1	PREPL
NUDT17	USP13	VEGFA	B4GALT4
FAM69C	PAXBP1	DPH2	RWDD1
LRRC71	RP4-635E18.8	PIAS2	BLVRA
UCMA	FAM13B	WIZ	SERINC5
ATP2A3	FLJ38379	CDK9	PTPRC
AQP4-AS1	SULT1A2	PFKL	LYST
PDE6G	HSPB8	LIG3	KLHL9
TBC1D10B	AX747652	HFE	SCN3B
STK32C	AGPAT4	SLC35C1	LZTFL1
MACC1	PRPS1	CAPN10	NFE2L2
ZFP92	KLF11	ARMC6	MBD1
BRCA1	DDX50	TRPM8	CTSO
PARPBP	LOC285181	H1FX	FEM1C
ACR	GABPB2	DCLRE1B	FANCF
PIK3R3	RPRM	EGFL7	WDR60
SUV39H1	C7	DDX56	TCEAL4
FOLH1	CAST	EDN1	ANXA5
DQX1	TPM1	DGKH	ROR1
SLC6A19	STX12	BCL2L1	NEK1
NUP210	SASH1	COX6C	LRRC48
AIM1L	AX746627	PLXND1	CXCL6
ACTN3	CDC14A	SIGIRR	RAB11FIP1
PBK	MPHOSPH8	ASL	MS4A6A
DPYSL5	U2AF1	RARA	SENP6
CHAF1A	FBXO8	CGREF1	GALK2
C11orf85	SYTL4	NOS3	FAM46A
BARD1	ZNF207	SIPA1	FNBP4
RP11-295G20.2	NOTCH2NL	TNNT1	CYP19A1
FSHR	HECA	TSC22D4	TMEM165
PPP1R37	ITSN1	RSPH6A	USP32P2
RHD	KIZ	TOPORS-AS1	LUC7L
CLCN2	CD14	CYTH1	GATM
ASB12	NRD1	SOCS1	FAM149B1
SV2C	TLR4	MBTPS2	ALDH2
SLC24A2	LARP7	RHOC	CCDC25
LCN6	LRRC2	KRT8P12	PSPC1
RNF208	CRYZL1	KRTAP5-8	NBPF1
MAGOH2	ZNF277	NUP210	EFTUD1
DNAJC2	SCIN	GDF11	AHSA2
CITED4	ZNF451	WDR76	NOC3L
SLC45A2	BTBD18	EIF4G1	DYNC2H1
LINC00176	PIGB	ENG	UGDH
LOC101929705	VPS13C	STAB1	TCEAL1
LINC00471	ADH5	MRPS11	BTN3A3
LINC00858	FLJ11710	ZNF592	SLCO3A1
PRAME	CRB2	SLC1A5	MAP3K5
LRRC8E	ZNF189	LOC100506603	CFDP1
TCTE1	C15orf27	C19orf53	DNAJC13
MAGOHB	CTD-3092A11.2	RPS6KB2	COPS2
ALDH3B2	NT5E	AKAP8L	ST13
MGC20647	MEIS2	THY1	SYT1
FOXP4	SMA4	PPP1CA	MTRF1
SSX3	DENND6A	AAAS	TDP2
LOC101927067	AHSA2	PCDH1	NLGN1
LOC100128164	MKNK1	COX8A	MAT2B
PSD4	RCHY1	MAPRE3	LAMB1
CDK16	MRC1	KCNN4	TMEM135
LOC101928823	RAF1	RCC1	TTC19
GNAO1	ATM	RAB11B	METTL18
EP400NL	ADRA2A	POP7	NHLRC2
MYO3B	RP11-320H14.1	PPP2R1A	C1orf123
SYTL1	HNRNPD	NKIRAS2	MAPRE2
LOC400756	RABGAP1L	SNCG	IFT74
CELA3B	CGN	SNRPA	THOC2
NR0B2	C3AR1	PAK6	PPP3CB
RCCD1	RPS16P5	KIF15	ZNF671
SLC9A1	RAPGEF2	CD72	CDV3
LINC01102	CYB5R4	ZDHHC18	RUNDC3B
GRM2	HDHD2	GUCY1B2	RABGAP1
CRLF1	TMEM59	NTHL1	NMRK1
ELFN2	WNT4	LYPD1	PRPSAP2
NOX5	TRIM4	RAE1	DCLK1
VSIG10	C11orf80	TTC39A	PRPF38B
C17orf100	DCP2	NCALD	EIF1B
PNLIPRP3	B3GALTL	CHODL	SFPQ
MYT1	MIRLET7D	DEFA5	NDUFAF1
SPTBN2	CBLN4	TCL1B	UBE3C
RGS16	IFI16	ZSWIM8	SEC14L1
MTFP1	RP11-1114A5.4	SSSCA1	MTR
INHBB	TPT1-AS1	PRKCQ	C6orf211
LOC283485	SETDB2	ATP2A3	CFP
MICALL1	PLIN2	GTF3C1	UPK3B
DPF1	PNRC1	EXOSC5	PNMA1
LOC100506274	CALCOCO2	SORBS3	ANG
RP11-203B7.2	POLDIP3	TAF6L	MAN1A1
NOS1	CAV2	SBNO2	CARKD
CLK3	ACOX2	KREMEN2	CDC42EP3
CRB3	CMTM3	C19orf24	SIAH1
ADAM32	MICU3	FKBP2	TCEB1
CASP2	IGFBP4	POU5F1B	MAP2K4
DUXAP10	HCFC2	CKS1B	STAM
RCAN3	GCA	LRIG1	MYCBP2
SLC25A10	GRK5	PTCH2	GIN1
LOC283177	SNX8	ACADS	SEC23B
TMEM45B	HTRA1	DNAJC4	ZDHHC8P1
UGT8	ARHGAP25	UBE2D4	LIMA1
HIST1H1A	PRPF38B	AKAP1	INPP4B
PNPLA3	PHYKPL	EPCAM	LETMD1
KATNAL2	NSMAF	CEP72	HNRNPH3
NDUFA10	ARHGEF6	TBKBP1	CBY1
BCL7A	PAPPA	AFTPH	SGCE
ZNF384	PCCA	RHBDD3	CX3CR1
TM6SF2	FRA10AC1	NDUFB11	BEX4
OR10H2	SLC6A16	IMP4	PRKCB
HIST3H2A	CXCR2	TTPAL	FECH
CEP89	ADRB2	ALG3	MTRR
LOC100289092	SOCS2	NXPH4	TOM1L1
LOC147791	TLR1	ANGPT4	EXOC1
BFSP2	PDLIM3	SLC5A6	XPC
DNAH17	CRTC3	MUC3B	GNRH1
ZNF92	GIMAP2	OASL	RSBN1
LOC100630918	FKBP11	KLHL22	SNX3
PLD2	KLHL13	SHMT2	POLR3B
LINC00307	NPEPPS	ECM1	FBXW7
PRSS8	BEX5	CHRNB1	ZNF267
LOC441528	COLGALT2	DMPK	ZFAND1
KIAA1257	LOC202181	SMARCC1	COPZ1
XAGE2	CCDC93	GPN2	CREB3L2
CEBPA-AS1	CD244	FKBP10	APOOL
ZNF385C	GNAI1	CD40	IMPACT
LOC101928303	OBFC1	LMNA	BCL2
LCT	AP000347.2	AURKB	MEX3C
LRRC55	LOC100131564	ATP6V1B1	LGALS3
FLAD1	SFXN3	CTDNEP1	AUH
LOC101928504	LCAT	PRPF4	SRSF7
KCNK9	LRRFIP1	FKBPL	RAB3GAP1
KLHL30-AS1	TERF2IP	PRPF6	NUBP1
RP11-1137G4.3	LOC727820	INA	JMJD1C
KIAA1614-AS1	HMOX1	CXCR4	SNRK
SRD5A1	AMZ2P1	CETN1	RWDD2A
CCNF	ZBTB47	MCM5	TNFRSF10B
FBXL18	NEU4	ZNF282	CCNG2
C17orf82	TDRD3	MAP4K1	FZD1
RPUSD1	FAM213A	PITPNM1	IRX5
ENDOV	LOC101928557	DTYMK	HEXB
IQCF1	CMTR2	STK16	AP3S1
POR	IGIP	RGS16	FAM129A
LOC101928389	GLI2	IRF6	KDM4C
LOC101927157	LOC100129550	RNPS1	KIAA0232
MAGEC3	C1R	ZNF253	KIAA0922
ASGR2	C4BPA	RAMP2	TRIP4
GRINA	SATB1	FSD1	TCTN1
LINC01213	KIAA1432	PSAT1	PPP1CC
C2orf88	CRNDE	TUBB4B	DIEXF
LOC148696	PLEKHG3	ESM1	NSG1
ZFAT	MDFIC	CYBA	SCML1
DNASE2B	IGSF11	PBX2	CCDC53
ZNF474	NPR2	LYRM2	SEC23IP
ITGA2B	FBXL5	SMARCAL1	KCNA4
ISM2	RP11-116O18.1	COPS7A	KBTBD4
WDR64	RABGAP1	MICALL2	CHMP5
C1orf86	USP47	ARPC5L	USPL1
SLC26A7	LOC100506014	PIM2	DYNC2LI1
TM4SF18	CTXN3	GNB2	SOAT1
HPSE2	SLC23A2	DHPS	SNX29P2
LIMK2	SNAI2	MVK	TMED5
LINC01101	NAPEPLD	PPP1R15A	TP53BP1
MAMDC2-AS1	MAML3	ZNRF4	ASNSD1
RASSF10	FAM13A	DLL3	QTRTD1
ATP8A2	HS3ST1	LZTR1	TDG
LAMTOR5-AS1	ITPR2	LOC220077	ZNF268
NABP2	NT5DC1	ATP5I	RECK
LOC730961	CLIC2	LRRK1	ZDHHC7
LTBR	C16orf54	KDM6B	GNG10
CKS1B	PCMTD2	SLCO1B1	GOLIM4
LOC401324	VIM	PMCH	PEG3
FAM71E1	SMPDL3A	CC2D1A	UGP2
USH1C	RHOT1	STAT2	PPP2R1B
LOC102725382	NUDT11	GID8	PIGV
WWTR1-AS1	MCOLN2	FRMD8	EBLN2
IL9R	TMEM200B	PPM1G	TGFBRAP1
HAPLN4	FKBP5	GLTSCR1	ANKRD36B
S100A3	HLA-F-AS1	SNRPB	RBM22
GPD2	ZSWIM7	CEBPB	USP47
ADAMTS12	PRKXP1	TCOF1	DDX46
SLC26A3	DNAJB9	MAP7	SQRDL
LEMD2	LOC285147	CTDP1	MFSD1
CABP4	ACSL1	POMZP3	MBIP
RP4-781K5.2	KIAA0368	PYGB	NFIC
RP11-155O18.6	EIF3M	KDM1A	CA11
CTB-43E15.1	CD163	HK1	CCR5
SARS2	LOC100129917	CELSR1	COBLL1
TGM6	NINL	RAD51	CDKN1B
PRKCG	PHF21A	CEP55	SNX19
VWCE	GSAP	CHMP1B	TRAPPC8
GCDH	LOC441081	SENP3	MORC4
C1orf177	ZNF230	EPHB3	BTN2A1
TCRBV15S1	RARRES2	CENPI	CRY1
SYNM	MTMR10	MMP24-AS1	RDH11
RGMB-AS1	TMEM43	MED12	RSRC2
LOC100286922	BTBD19	MIF	KLF7
SLC5A4	PRIMPOL	C19orf73	ZNF214
HIST1H2BM	PTGER4	PRAME	UBE2Q1
DIRAS2	ROR1	CEBPG	10-Sep
CELP	UBXN2A	BZW2	ETS2
ACKR2	FCGR2A	ARID1A	CD53
CTD-2083E4.7	KDM6A	CHMP1A	ZNF180
LINC00092	SDC2	PLEKHM2	NFE2L1
CADM3-AS1	SMOC2	IRF9	QKI
UNC5A	MTERF2	MMP11	ATAD2B
RD3	TBC1D8B	SNRPD2	ITGAV
PRADC1	MAN1A1	ARSF	AMOTL2
LINC00337	NPNT	TM7SF2	USP13
EXOC3L1	SPANXB1	LAGE3	BBIP1
NME8	HBP1	NOL6	SNX24
LOC100507388	CLEC4A	BABAM1	PITPNB
LOC101929002	POLK	CHKA	ABCA11P
LOC100505635	PIP4K2B	ABT1	RBBP6
SRPK1	TRMT13	DCAF10	GAPVD1
RP11-338N10.1	RP11-2E11.9	CLPS	DMXL2
LHFPL1	SH3BP5	RBM42	SUPT20H
DDA1	OTUD3	DUSP10	SLFN12
HES4	ZNF500	CCNB1	UBE2G1
KLHL26	CCNDBP1	DALRD3	MSRB2
ANKFN1	MS4A6A	COPA	EGOT
APLF	UNKL	HNRNPU	RBM39
REM1	LIAS	YIF1B	TMEM131
ALDH1L2	MOCS2	CNNM3	GAS1
LOC148413	PYGL	MPST	STK24
NKPD1	VNN2	NRL	TERF2IP
GPR160	SNX33	EFNA4	SPRY1
OXER1	AF198444	DOC2B	VNN2
TEC	LINC01140	GPI	CPEB3
PEX14	PRKG1	SCGB1D2	DYNLT3
LOC101929648	ZNF658	ITGB4	DHX15
MIER2	TDRP	HDAC6	JAK1
KIAA1549L	SLC17A5	IL17RC	SMPDL3A
MAMLD1	PYGB	S100A14	RBM25
FAM170B	SRL	ELL	VPS35
PAK1IP1	NHSL1	GMEB2	CLDN1
HIST1H4H	PURA	PGLS	MAP4K5
OIT3	ANGPTL2	HYAL3	RALGPS1
ZBTB12	CNKSR2	SLC2A8	PLA2G4C
LOC102725343	AADAC	SSR4	TST
NOVA2	ALAD	TFPT	EP400
CAPN9	KCTD2	TMEM132A	KIAA0895
RP11-664D1.1	PLEKHM3	CACNA1H	NEK4
CRX	LOC101927330	WAS	ZNF143
MYOZ3	SRGAP2C	HHLA1	UBR7
LOC101927256	BC022047	PLEKHG6	RTN4
GALP	TLDC1	MT1H	YLPM1
LOC440117	SMARCC2	GLYR1	SCYL3
CCKBR	FAM102B	PVR	ANGEL2
UPK2	LY96	THBS1	SEC22B
HIST1H3F	FNDC4	CLDN6	ZEB2
AGAP2	LEPROTL1	FAM3A	USP25
KIAA2013	MYRF	CDX1	HMBOX1
ALPL	FZD7	SLC34A2	PRKD1
NOL4L	SIRT2	CLDN10	FAIM3
LINC00642	AGAP4	GCK	MIEF1
KCNQ1-AS1	CCDC90B	SMPD1	PANK2
ANXA10	CELF6	LLGL2	PPP4R1
ADORA2A-AS1	RP11-999E24.3	ZWINT	TFEC
DIAPH1	LUC7L3	VAV2	PDGFRA
MIR205	PGRMC2	CHST1	CORO2B
ETV6	CAPRIN2	DSCC1	MYRF
HES6	CACNA2D1	LNPEP	TMBIM4
SPATA16	ENKD1	RAB26	ASPHD1
USH2A	MYO1F	AIP	ABCB1
HRK	AK021977	CXXC1	MPHOSPH9
KLHDC7A	EVI5	RLBP1	ARHGEF6
CRYBA1	PDGFC	PRRG2	GIMAP6
IFITM10	TTC8	HDAC11	ACAA2
ANKRD2	RP11-247L20.4	DNAJB5	KCNB1
KLF15	CLEC2B	RPS14	PCM1
CSPG4	BTK	UBTF	DECR2
CHRNA2	JMJD1C	TIMM44	MUS81
ZNF425	STK33	INPP5K	EPHB6
LOC100422737	UBE2Q2L	SSBP3	DDX50
HAS3	GALNT10	MACROD1	FIG4
ASS1	RP11-28F1.2	NOC4L	ENOX1
LRTM2	RP11-182L21.5	PI4KB	CLEC4A
LINC00927	SNX1	CD248	TRIM2
C5orf46	ELF2	LINC00652	ENTPD1-AS1
AC007389.3	CYBB	HIST1H2BL	ZDHHC3
NXPH4	COL8A1	ZNF668	ZNF813
JAKMIP2	FKBP7	IGHD	AADAC
C12orf42	CDC42EP3	SSTR2	MRC1
ZSCAN25	JOSD1	MRPS34	BECN1
HR	CACNB3	UBIAD1	ADIPOR2
CNNM2	GALNT18	CNNM4	WBP4
LMNB2	TMEM71	SERPINH1	ZNF271
GMIP	ST6GALNAC3	FBP2	HCP5
APOBEC1	SCG5	ZNHIT1	UBE2B
DUSP10	ASPA	FADS2	SNAPC5
ZMYND19	C1orf101	CNN2	NUP153
WFDC12	LAMTOR3	MCHR1	BICD2
AVL9	PCED1B	TNFAIP2	SLC36A1
ACAN	ATXN10	PCDHGA9	ACTR6
LOC158960	ISL1	TEAD3	RRP15
IRG1	NPIPA1	HIST1H2AK	DDX52
ELFN1-AS1	CCDC126	MAP3K10	CALD1
SCD	IGSF9	IPO4	SULF1
HRG	WDR41	IL22	DNAJB14
LOC285191	CPEB4	OR2F2	UNC50
CCDC70	PDK3	LSG1	FAN1
ZNF253	ID2	SLC6A8	TRMT13
JAKMIP2-AS1	C10orf32	DEPDC1	TGFBR3
CPB2	SH3GLB1	BFSP2	LPGAT1
A2ML1	DPP4	SNRPF	IER5
DLX4	TAOK1	HIST1H2BD	ECHDC2
ADAM18	KDM4C	TOE1	CCDC91
ACTL6B	PRKD3	C1orf35	UTP6
LOC101928666	CRIPAK	SULT1C2	RBFOX2
GALNT5	SLC7A4	TLE3	PWP1
DQ576800	THRA	ABCA2	SLC39A6
COL23A1	FAM150B	FCHO1	EIF5
CNKSR1	RSPO1	MOB3B	S100A10
FANCB	FGR	SLCO2A1	DHODH
SSX2B	PGM5	ARFRP1	CENPC
POTEM	ARL2BP	ZFPL1	ERI2
TOM1	DPY19L2P2	MELK	PIGG
ZDHHC22	FAM73A	TIE1	USP46
MAP2K6	IRX5	CEBPA	LIPT1
LOC399900	MDM4	HOXD13	ACYP1
NHLH2	ATP8B2	KCTD13	SNAI2
ZFP57	TMEM245	WFDC1	TERF1
NPAP1	NCOR1	CST3	ZNF33B
KLHDC7B	MARCKS	NEU1	PALB2
CYP2D6	LOC102724356	HGH1	WASF1
TELO2	ZBTB4	ICAM2	MID1
ZNF696	GBGT1	FAM90A1	ITSN1
LOC101927093	EIF4B	TFCP2	CBX1
GLRA1	ENOSF1	CCNF	HCK
ZNF843	FAM161B	DUSP5	PAPOLG
RFC3	XPA	C20orf195	ELOVL5
FOXD2	TNRC6B	LSM2	SLC30A1
MYO9B	SCARA5	IGHG1	SSBP2
EYA3	RABEP1	USP19	IGSF6
DGCR5	ERCC6L2	ADAM15	TM9SF3
CAPN5	GKAP1	APOBR	STX7
ARHGEF19	SNHG18	GPD2	GEMIN8
MANEAL	TUBE1	MZB1	MAN1C1
XKR4	CCDC53	PHLDA3	ZNHIT6
ESAM	WT1-AS	ZNF580	CREBBP
POU5F1P3	LOC101929335	FLT1	TP73-AS1
TMEM169	HOXD9	IFIT3	PRR15L
PCDHB18	RALGAPA1	SUGCT	ABLIM1
MXD3	TBC1D5	MEPCE	EVI5
3-Sep	COLCA1	AHCY	HERC5
IPO9-AS1	ABCG2	CWF19L1	C5orf15
LOC102725116	SGPP1	RUVBL1	SMC5
TNFRSF18	BLOC1S6	CTNNB1	FAM172A
FAM20C	C1orf162	PRR5	TNPO1
C10orf25	SCAF4	FAIM2	SEPP1
SOHLH1	PSMD6-AS2	JAK3	SLC25A14
LRGUK	OGT	PPARD	TFB1M
FAM107A	NDUFS4	SH3BGRL3	SIK3
C17orf50	C2orf42	PTOV1	KLHL2
ZNF628	LOC284023	FBXL18	TSEN2
RNF157	HERPUD2	PAFAH1B3	ACOX2
CTLA4	PDE1A	CERS4	PRKAA1
CBLC	TXNDC15	CYB5R1	KIFC3
LINC00174	EIF3F	IFI27	LPAR1
ARID3B	FBXL13	SKIL	TUBGCP3
RRP9	AK026905	MIR1244-3	MDN1
HK2	PPP2R3C	PRR7	THAP11
CLDN16	KIFAP3	TUBBP5	ANKRD28
SHROOM4	PLCG2	TADA3	CCDC69
ZNF775	BBIP1	POLA2	CTBS
RGR	SIK3	HPS1	PIK3CB
CYP26A1	HEBP1	TXN2	BCL10
LOC100505478	KCNJ2	QPRT	CEP68
DKFZP434K028	SRSF3	DUSP3	MINA
GPRC5C	TRIM13	PCDH7	ZNF197
IL36RN	PAQR7	PPP3R1	CRIPT
RTKN	FRMD6	PRUNE	SERTAD2
BCAN	NFIB	TMEM110	GLTSCR1L
C4orf45	KIDINS220	STIM1	MED23
LZTS1	TGFBR2	HMOX2	C4orf27
MCAM	RP11-680G24.5	EXOSC2	KIFAP3
CDC42BPG	DPYSL2	PRSS2	TMEM14A
LINC00668	RELL1	MAD1L1	CRYZ
MUC20	STK4	MYCL	OTUD4
KRTAP3-1	ANKRD36B	PCBD1	PDSS2
LOC101929505	GPATCH8	PHC2	IFNAR2
NRL	SETD7	WBP1L	CDC42SE1
ADAM19	FAM160A2	LOC101930405	AGBL2
GSTP1	CYB5D1	RNF216	AP5M1
CYP27B1	SMARCAD1	NME4	TMEM87A
TACR1	CBX6	FZR1	AP1G1
CCDC88B	ALDH3A2	GJB3	FPGT
SCNN1B	ANGPTL1	FAM107A	C12orf29
FASN	SERINC1	KANSL3	ACVR1
RP11-359E8.5	KIAA1244	ADM2	INTS12
C20orf196	PLXDC2	STRA13	SMARCA1
LOC644090	KLK11	GNL3L	ASXL3
LOC100506207	ZNF532	RAB23	EIF3J
ACY3	PIAS1	DGKD	ARID4B
HIF3A	B2M	CNTD2	ID4
RTP3	CNIH1	PXMP4	MYO5C
FAT2	LINC00622	C17orf80	AKAP9
SLC50A1	AMIGO2	TMEM151B	PDLIM5
CEBPG	ADPRM	TMEM147	CTC-425F1.4
LIPE	RP11-722E23.2	MYH14	NEDD4
HNF1B	SULF2	KCNIP2	GJA1
SLC12A3	TET2	PLEKHO2	TGM1
MC2R	LINC00173	TNFRSF4	PEX11A
CASQ2	DLG2	TES	LRP2
RP3-412A9.16	PSMD11	GOT1	PFKM
LINC01144	BTN3A3	RNF25	BET1
SPTY2D1-AS1	DOCK10	GABRD	PLLP
TTC6	CLIC3	ST6GALNAC2	USP7
DEFB1	DQ570096	KRT2	PRRG1
TVP23C	MACF1	ROGDI	EOGT
APOL4	GLIDR	GTF3C4	FAM175B
CNPY1	CEP120	NXN	SLC25A17
SIPA1L3	KLRB1	BAZ2A	TRMT11
FAM83A	BTRC	TSPAN1	KIAA0753
BARX2	ANXA9	PTMS	PYROXD1
RP11-85A1.3	TOR1AIP1	SNHG17	ANK3
GMNC	RBL2	RANBP3	CENPBD1P1
HPDL	CYBRD1	KLHL26	ZBTB38
CA14	SLC4A3	AUNIP	FKBP1B
LOC101927348	RAP2C	POLD2	MTIF2
RSPO4	BASP1	TYMP	RAB33A
FIRRE	PCDHGA4	C12orf10	SLC37A4
SKAP1	ST13	KCNG1	WHSC1L1
AKR1E2	ANO6	DDN	DDX60
TACR2	REV3L	PIK3R5	FOXO3
LINC00202-2	HNRNPA2B1	LPAR3	LSM14A
RP11-521D12.1	MN1	CEP164	CCDC90B
KIF22	C2orf40	GPM6B	USP8
CARD18	STXBP3	PMFBP1	MKL2
LOC100507391	ZNF45	TRIB3	AASDHPPT
GRIK5	EVL	TREM2	SUV420H1
ATP6V0E2-AS1	ZFYVE1	RAB3A	ITM2B
TBX10	RP11-68I3.11	HYAL2	GNE
PLEKHG2	TAPT1-AS1	KMT2B	PACSIN2
PPP1R14C	CAPN2	CPN1	PRKCA
CCDC135	PEX12	TPD52L2	FOCAD
MVK	NEDD4	METRN	PIK3R1
NS3BP	TNFRSF10D	NRGN	GMPR2
RNF215	DMXL1	CHRNE	PRNP
FOXN4	MON1B	RBM38	GOLGA8A
GALNT3	DENND4C	GKN1	GAR1
HAVCR1P1	SLITRK5	SEMA4A	CYBRD1
PEA15	ITPR1	GM2A	YIPF6
TIAF1	FOXL2	AES	UAP1
BC047364	RBP7	DEFB1	CYB5A
ANKRD65	GNE	RARG	CAPN7
C19orf73	DET1	CNKSR1	ARHGEF3
RAB43	FNIP1	NDE1	ZNF277
DGCR12	GLG1	PIDD1	NXF1
TMEM38A	NLGN1	WDR70	WRN
FGFBP3	DPY19L2	EPB41L1	FAM178A
RP11-1152H14.1	ESD	PLIN3	C10orf76
TTYH3	NMRK1	VEGFB	EIF4ENIF1
EXOSC3	ZNF331	MC1R	WT1-AS
GOLGA6L2	DMXL2	RP1-149A16.17	PARN
ADM5	SH3BGRL	KRT23	DROSHA
C15orf49	KCTD6	ISYNA1	VPS13A
NOX4	TMOD1	DIO3	PRDM2
CRHR2	RNF34	IL27RA	ARID5B
PI15	TGFB1I1	MTMR12	DENND5B
RNFT2	ZFP90	LPCAT4	REV3L
NYAP2	ETFDH	DCLK2	WNT4
ANKRD22	COL27A1	PDE1B	DEK
DGKZ	ROBO4	NCAPG	SEC14L1P1
AC005256.1	HGF	KLK5	PUS3
GPR21	TRAK2	PRKAB1	EIF3L
PLEKHG6	MSI2	EIF2B3	ESF1
ASB13	AK096159	ODF2	SRSF5
PRAMEF10	GATA6	ENTPD1	MEGF9
PYGO2	EHBP1	NPLOC4	CAMSAP1
SEC14L5	HCK	UBA6	ZC3H4
POLR3K	RP5-855D21.1	TMEM223	STAG2
TP53AIP1	DENND2C	TOR4A	DERA
TSPAN1	AMIGO1	NECAB3	RBM12
ST8SIA2	MITF	TFDP2	PGBD5
DLG3	DMRT2	GRB7	HSD11B1
LOC102723380	NRK	CLPP	PJA1
XCR1	MAP3K3	TEP1	TMEM123
OR7A17	ZNF471	PLA2G2F	SMC1A
PGBD4	KLF10	ZNF688	ADCY7
IQSEC3	LINC00473	CITED1	NUDT11
GINS2	PIGH	MTG1	GSTA4
LINC00687	C1QTNF7	ENTPD5	EPHX2
ZNF85	GPATCH2L	SSUH2	GBP2
NBPF4	SLK	OSBP2	BNIP3L
RP11-410L14.2	RAB14	FOXJ1	TDRD3
TMPO-AS1	NCKAP1L	APOE	MAN2B2
GRHL1	ZNF160	TNF	GABARAPL1
LSM4	RP11-75C9.1	NXT1	NOVA1
CYAT1	INPP1	ADAM11	FKBP11
LRRC72	RHOBTB3	INTS1	AVL9
TRHR	L3HYPDH	UBOX5	SDC2
TMEM95	RAPH1	ZGPAT	MAN2A1
CABYR	PEAK1	PLTP	PIGN
PHLDB1	ECI2	IGLL3P	CRYZL1
LOC283585	FRMD4B	CTDSP1	DENR
BEND3	RHOBTB1	LAMP3	TMEM80
NEU3	HDAC4	FZD2	KANSL1L
LOC101927886	TRMT10B	RIN3	MTMR6
WDR74	MROH8	FGFR2	TMOD1
OAS2	FERMT2	LRP8	EPM2AIP1
OPN4	MAN2A1	FAM46C	C11orf95
PARD6G-AS1	GAB1	PAQR6	FNBP1
TEX37	AK000798	SENP2	UNC13B
JHDM1D-AS1	RBPJ	TMEM248	UFM1
PDLIM7	SPRY1	LRRC41	TP53BP2
LOC100507480	BC047651	TNK2	STAT5A
LOC100507501	KANSL1L	PPIL2	DOCK10
NPC1L1	FCGR2B	SREBF2	KIAA0513
PPP4R1L	KATNBL1	NABP2	FOXN3
RP3-359N14.1	GABRA2	MARK2	ZSCAN31
SVOP	LOC100506299	NDUFA7	HMGN4
TTLL9	BTN3A2	GPR162	RBM6
COL6A5	MIR646HG	ARHGEF17	PIGH
SRD5A3	VPS13B	MAN1B1	KRR1
TMPRSS5	MPP6	ATF6B	SLC44A1
KLK7	HOXA5	CYP4F11	TMEM41B
DNAH3	ZBTB16	DDB1	SNX4
BTLA	ZNF227	SOX5	C1S
RP11-474P2.2	TGFB2	ERCC6L	RNF34
SOWAHA	ERVK13-1	PMS2L2	SKI
ARL5C	SEPP1	EPHA1	SPATS2L
MATR3	LOC101928429	KIF18A	CEP135
RAB6B	NAPB	GTSE1	HMG20A
BCL10	LYSMD3	TBL3	ZSCAN9
CATX-1	HHAT	TKT	ANXA2P1
PPM1G	WT1	RGS1	UBP1
GRAMD2	NIPAL3	GUCY1B3	ABCA6
KIAA1524	RNASE2	FKBP6	PTHLH
VGLL1	TRIM66	PHACTR4	USP9X
GRAPL	C15orf59	RP1-101G11.2	SELENBP1
LYPD8	PCBP2	TMEM8A	AIM1
LOC101929116	WDFY3-AS2	CEMIP	CRTAM
KRTAP4-5	PPM1E	EPPK1	ABCG2
ZAN	RNPC3	PHLDB1	B3GNT1
ZNF829	FAM160B1	ADCY6	FAM168B
MECR	CNIH4	MTNR1B	IL15
RP11-504A18.1	ZYG11B	PMCHL1	TIA1
SLC29A4	TMEM218	AGMAT	SH3BGRL
ODF3	RWDD2A	CTSA	NMT2
EPS15L1	MIB1	COL15A1	HERPUD1
CEP41	AFF1	MARK1	DHX32
LOC101929196	OGFRL1	TNPO2	ZBED8
LOC100129461	IGFBP5	FZD10	KLHL21
GJB4	NR2F2	CDKAL1	MED1
PNMAL2	PKDCC	APBA3	PPP2R5C
NRSN1	HPS5	SLC25A15	PTEN
CTPS1	BC062753	MFNG	ARHGAP32
AMZ1	ADIRF	GPR21	PLEKHA1
PNMA3	RBM18	SCRIB	ZNF606
CDKN2A	LOC102724316	SLC22A13	PPP1R13L
IQCF5-AS1	ANKMY2	CLN3	DDX17
FDXACB1	RNF10	PTGER1	LARS2
SMAGP	C9orf84	ZDHHC13	CALML4
BCORL1	TANK	PGD	PHF2
ZNF527	MFSD2A	SLC9A5	NEDD4L
MROH6	GOLGA1	ESRRB	TOP2B
LOC100996342	MAP1LC3B	MTHFR	YTHDF3
DNPEP	PPP1R3C	LSM8	SRSF10
EQTN	SEC24B	SLC29A3	ABI3BP
GPR137C	JADE1	HNRNPUL2	ZNF26
NLRP5	PTCD3	TMA7	ZNF236
CTCFL	DYNC1I2	OR7E47P	TRIM33
MPZ	MAFK	EIF6	COX15
C12orf40	GK3P	SPINT2	TNFSF14
LINC00930	ND6	HCFC1	ICK
LINC00845	PDE10A	RPL35	UTP14A
ADCY4	ALG13	TRPV5	CTNNAL1
CAV3	CMTM4	SPTBN2	NFIB
LOC101927038	LOC646014	PEX14	LMBRD1
PKHD1	NAP1L5	NUP188	LARP4
LINC01350	OFD1	ELF2	UBQLN2
S100A14	MFSD1	AP1B1	CXADR
MOSPD3	SLC26A6	SFTPC	F13A1
NCAPD2	RPS27L	MAP1A	SETD1B
SAMD15	SLC26A11	ATG10	LAMP2
Ndufaf4	TBC1D12	POLR3K	ZFX
RP11-574H6.1	RHOQ	VGLL1	NOTCH2NL
PTK6	LEPROT	ITM2C	ZSCAN26
ABCD3	PLS3	B3GNT4	CTR9
FUT3	TNFAIP8	ICAM1	CCNC
RP11-443B7.1	RP11-727A23.11	SLC8B1	PSMD7
B3GNT4	GOLGA8A	IGLL5	DECR1
GABRA5	ZNF654	PTPRB	SIPA1L1
LOC100134040	LINC01133	HSPD1	DNMBP
SUSD4	WDR61	ZNF85	GZMA
HARBI1	DZIP3	TIAM2	ASCC3
LOC285819	FAM179A	VTCN1	ATP9A
DTX1	FNBP4	SLC7A5	USP33
VEGFA	MPEG1	RALA	NUDT13
LOC283674	JADE2	CTRB2	ACADM
TSPAN10	NTAN1	BEST2	RANBP2
DGCR10	RP11-1109F11.5	GPX4	SESN1
P2RX2	UBE2B	KCTD17	PPL
GPR135	ZNF234	HHLA3	HEATR6
LOC340074	KIAA0922	SPON1	ACVR2A
MATN1	SLC7A7	TSSC4	SEC22A
LOC729680	KLF8	FAM65A	TRAPPC2
RNF165	FAM122A	TAOK2	MKKS
ACRV1	ACOT9	LRCH4	KLK11
MRPS15	RPS11	P4HB	GCLC
TMEM185B	ACSL4	ATP5D	FLJ10038
SLC22A7	ASB1	DDAH2	KPNB1
CTD-2587M23.1	PPP2R2A	FAM32A	SECISBP2L
TAS2R7	CRTAP	DCTN2	PUM2
PRNT	NEK5	MPZL2	RCOR1
RP11-352G9.1	NEK7	DUS1L	LHFPL2
RP11-102M11.2	SLC40A1	KSR1	IRF8
C8B	SNX30	AOC4P	EFNA5
ASL	LEMD1-AS1	TRAPPC3	ADRB2
TTC16	IKBKAP	C19orf57	HIBCH
GABRQ	C5AR1	NR0B2	CLEC7A
ZNF784	TBC1D9	TM9SF4	BCAS2
H2BFS	RRAS	SLC7A10	ATG3
LOC285043	FBXW7	BCKDK	GNA12
RAPGEF5	LONRF1	MPG	CCND2
FOXA2	RICTOR	CLEC1B	GPN3
LOC283731	PPIL3	A4GNT	GSTM3
SNCG	MLXIPL	SMARCC2	UBE4A
CNTNAP5	AKAP17A	SPRR3	CRTC3
C6orf123	EID1	DGKG	FAT4
CLDN9	RBM39	GPR15	VPS41
HRASLS2	FBXO31	DDX49	KIAA0485
AC079305.10	MTMR11	HOMER3	UQCRC2
MORC2-AS1	BNIP3L	PORCN	GRAMD1B
DEFB126	F5	B3GNT2	TTC12
CXorf30	NFE2L1	PLK4	INPP5A
CCDC34	TMEM161B	MRPL11	ITGB3BP
GLIS1	TAGAP	SPAG4	SEC11A
LINC00592	LOC100129455	RP11-54K16.2	CARD8
PSKH2	RBBP4	LOC81691	METTL9
CCRN4L	ADAMTS19	CACNA1S	CREBZF
IL4I1	ZCCHC11	LIMD2	FBXO28
SH3BP2	AP5M1	MAP1S	WT1
PC	CNOT6L	ZNF574	EIF3A
MAGIX	TBX3	MYH9	CALCOCO2
SPINT3	FPR1	LOXL1	CIR1
KLC4	MAMDC2	COX6A2	SF3B1
GABPB1	MMP24	TJP3	LRBA
VN1R10P	GMFG	VPS72	DENND4C
GPR132	GREB1	GALE	BAZ2B
ZNF668	MEGF9	CASP2	MDC1
TBC1D2	ZNF542P	GPR161	C9orf156
SMG9	ID1	ZNF324	ZNF281
RP11-646E18.4	JAKMIP3	ARNTL2	EMC7
NDE1	KLHL20	KNTC1	ORC3
HTR1A	TMEM55A	FOXD2	OTUD3
FHAD1	ACPP	HIST1H2BK	MAGEH1
TAAR5	ZSCAN18	PDE4A	WAPAL
FGF21	CCDC50	PNO1	HGSNAT
TAGLN3	MGAT2	UCKL1	CFD
PRMT5-AS1	EIF5A2	HIST1H2AE	POGLUT1
LINC00536	SSBP2	CAPNS1	OSBP
LINC00032	IGBP1	PDCD11	TBK1
ARHGAP11A	NXF1	ETV4	SAMD4A
RP11-567I13.1	COL4A5	DTX2P1-UPK3BP1-PMS2P11	ENDOD1
RUVBL1	KCTD9	SLC5A1	GPR65
SLC8A3	GABARAPL2	TP53	DMTF1
FCAR	OTUD7A	NDUFA4L2	ZNF516
LINC01330	LOC100506990	CD74	TUSC3
LINC00867	FBXO7	MRPS16	PCNX
MYOM3	DCTD	SDS	PSMD11
CSNK1G2-AS1	TMEM64	DHX8	KIF1B
LOC101928535	AZI2	CEP85	LOC100506282
VSTM2L	LYZ	MYLPF	SUCLG2
PPP1R16A	GOLGA8N	FGF12	CLK2
LOC100507395	SNX21	ATG9A	PAXIP1
PPEF1	WDR6	NOTCH1	ABI1
CSF1	DLG5	WBSCR16	RBPMS
LOC286382	CLSTN2	C1orf159	NEMF
LOC145845	MCTP2	KIF11	LPIN1
TMEM206	LIPE-AS1	EPN1	ODC1
DGCR7	RUNDC3B	GUCA1B	SELL
ZNF710	CWC25	PPP1R10	SSPN
NDOR1	NUDT12	C16orf71	HNMT
CHRNE	FAM133A	EHBP1L1	ACADL
AGBL1	RNASE6	PVRL2	AMHR2
LINC00664	REV1	CD34	VNN1
BTNL2	ANKFY1	ST8SIA2	MPHOSPH8
PRUNE	CREB3L2	NUP62	RPL3
LINC00654	AMPD3	IQSEC3	C3
MAT1A	FAM126A	IFT27	PTPRH
KIAA1841	ITPK1-AS1	GLUD1	PRKCDBP
NCAPG2	BIVM	NDUFA13	PDE1A
GPR37L1	FAM175A	BAIAP3	SLC16A4
TBX19	TRIM22	ETV5	SNRNP35
IL1F10	DZIP1	EXO1	C3orf18
SPTBN5	LGALS3	HMX1	PCLO
PTX3	SEC14L1P1	RABEP2	TMEM33
LRRC37A5P	CCR1	SYT11	PDS5A
CHRNB3	RNF13	MMP7	TTC33
RP11-384L8.1	DMTF1	MED16	PTPRO
LOC729291	DENND5A	PBK	RNH1
SLC17A9	SLC20A1	COX6B1	RAB8B
RASGEF1A	DECR2	USP39	LPXN
CDC7	ZNF226	SVIL	SERPINI1
RP11-255P5.2	GABPB1-AS1	PRSS21	C16orf80
C15orf39	SLC18B1	TRIM29	TRIP12
AF001548.5	GALNT15	ZBED1	PRPF3
FASTK	SRGN	SLC12A7	CLIP1
GUCY1B2	PRKRA	DBNDD1	GTF2F2
PWWP2B	NXPH2	GUSBP11	CD163
GGN	ZNF25	PHKG2	ALG5
VHL	MEIS3P1	SNRPE	LCMT1
BMP6	TLR8	NPRL3	OPTN
CEACAM7	PHKB	MAL	LRPAP1
MEOX1	PSMG3-AS1	PART1	ANXA9
ATXN7L1	ANXA4	ATG4B	LIMCH1
TMEM63C	MIATNB	CCDC9	CCDC51
GJA8	STX7	AC003989.4	RPA1
REG1B	TXLNG	SKA1	CBX6
NYX	TRAF3IP2	HIST1H4I	NUDT6
ASB2	APH1B	PHOX2A	FAM120A
FAM221B	JKAMP	BPHL	TNFSF13
ST7-AS1	NUDT6	PTPN14	CNIH1
MAP3K9	PPP6C	ZFHX3	SPINT1
LOC102723847	GLUL	CORO7	CAMSAP2
HRC	AFF4	CHP2	EIF2B1
C1orf116	ATP8A1	MALL	DST
LOC102659288	SRSF5	DPM2	ADH7
PKN3	LINC00663	PODXL2	CNOT6
EXOSC5	ZNF404	ATP6V0E2	PIGP
ST20	FAM129A	SEC14L3	NBAS
GPX2	ZNF662	C8A	DNAJB6
RP11-60A24.3	MYO5A	ARMC9	TECPR2
UCA1	ANKRD11	NRP2	BRD8
JAK3	TRIP12	NPTXR	LAMTOR3
APOBEC2	ZNF330	CDH5	ASUN
WFIKKN1	AF090939	SMAD6	SERPING1
EFNB1	DLEU2	C17orf59	NAE1
LOC441204	CHP1	AP2S1	CXCR2
NLRP14	FAM19A5	TPM3	KCTD3
GPATCH3	DPY19L3	TNIP2	TMEM100
POMGNT1	RASSF8	PEF1	GNPAT
LINC00935	FAM198B	ABL2	SMIM7
RP11-676J12.6	NCF2	ZBTB48	APOBEC3F
EIF5B	FDXR	PIN1	MDM1
SLC7A10	SSBP3	USP18	RAB9A
LILRA5	TBC1D15	CTPS2	PNMA2
SMARCD1	NEK1	PYCR1	ZBTB43
SPATC1L	HECTD1	CCDC28B	PCMT1
LOC100133461	LOC389765	FOLR3	PLEKHA5
LRRC45	SH3RF2	BORA	ARL4A
C1orf158	CCNI	MAP1LC3C	NPY
LOC101928682	ZC3H12C	LPAR2	ZNF232
MYH11	WDR7	ALX3	MCFD2
LINC00221	ZCCHC6	KIAA1211L	NKTR
TMIE	HNRNPDL	MT1F	SMARCA5
C6orf106	POU6F1	SEC61G	TNS3
RP1-8B22.1	MGAT4C	SRRM1	RIN2
LINC00520	CRYBG3	P2RY2	ASTN1
DOC2B	LOC440434	ARL2	OGFRL1
LOC101927648	ARGLU1	ELAVL1	MOSPD1
ZDHHC12	EPS15	POLG	ANXA1
MAPK15	TMEM136	COL6A2	HS3ST1
LOC390705	AASDH	MPI	ZZZ3
CEMIP	FIG4	HLA-DOA	PSMC6
BAALCOS	TBCK	RRP8	PRPS1
LOC157273	SPOCK2	CDC37	OPA1
CCNO	ZC3H12D	ICA1	ICE1
POLD1	C1orf123	LDB1	ITGB5
SLC52A3	LILRA2	PKDREJ	TLDC1
ABCG5	DOCK3	ELTD1	PLEK2
IGSF1	ZMAT1	RPL32	TRO
KIF12	LOC340085	ALDH3B2	JAK2
GFI1B	DYNC1LI2	SEMA3F	ARHGAP25
RP4-647C14.3	COBLL1	TUFM	ZBTB11
PMS1	DAAM1	SGTA	HTRA1
RP11-109E24.2	CTNNB1	TRIM15	TEX261
ST3GAL6	CYTH3	VPS9D1	NINL
LOC554174	ZMYM2	CCNE2	C1GALT1
SBK1	SWAP70	VPS37B	BRE
PKP1	ZNF573	PITX1	GABRB1
OR2W1	FBXO25	MROH7	RNF11
MCHR1	DCUN1D3	GPR25	ARFGAP3
HIST1H1D	PHACTR1	PLXNB1	ETNPPL
PRR22	DYNLRB2	DLG4	GNAQ
DNAI1	NABP1	DNAH3	INPP5E
SPATA12	CLTC-IT1	PSORS1C1	CTSC
GPR123	USP34	DNPH1	C5
LOC286121	PPBP	ACHE	SMARCD3
PSCA	KAL1	ZBTB7A	GBE1
SV2A	COL4A6	IL2RG	EXTL2
RP11-389C8.2	C7orf31	WNT11	NCOA1
GALE	GPR1	IL15RA	RHOQ
OR1C1	CES2	ALDOC	PLA2G12A
TCOF1	FAM200B	CHEK1	CAPN3
CCDC63	TTC28	CCNO	ADI1
ADAMTS13	ANKRD10	PRPF19	CTSS
LOC101929538	GTF2H1	FAAH	C14orf132
PHEX	ZSWIM5	GSTK1	ALDH8A1
GPRC5B	CNST	FUT3	FAS
NDC1	RPA3OS	MAPK11	NR1D2
RP11-127B20.2	LHFP	ELK2AP	IFT57
CBR3-AS1	HEXB	KRT85	ARHGEF12
NLRP6	AKAP13	GIT1	HMGN5
FAM46B	RP11-73M18.8	LRRC20	KIDINS220
TPRXL	TNKS	ZNF682	VIPR2
CEP70	EPHX2	DCHS1	NEK11
C21orf128	SPRED1	IFRD2	PDGFRL
KCP	SURF1	LDHC	CAPRIN2
RP11-402G3.5	ARRB1	UPF1	PSMA2
DCSTAMP	LYPLAL1	HMBS	CEP350
TREML4	RORA	TNFRSF25	MICU2
NXPE1	SLC12A6	AMFR	MED14
RTKN2	S100A8	CLEC5A	PARP8
IL17B	RNFT1	TRAV8-3	RNF138
DPP3	SMDT1	GDF15	HNRNPM
ZNF619	PKIG	IGFBP4	GRAMD4
GPR3	LOC100133130	PLXNA3	ATG12
LOC101929261	GOSR1	OCEL1	RPS6KA2
PFKFB1	SEMA4D	CHPF	DNAJB4
VPS13A-AS1	XIST	CACFD1	MFAP1
DCX	WDR44	PIWIL2	CLCC1
LOC101929657	SERGEF	TYMS	EIF2D
FAM83H	LOC100507073	TNIP1	GALNT1
OR8D2	ZDHHC2	LINC01260	CPQ
ERBB3	RP11-373D23.2	DDX39A	PI4KA
TEAD4	DAB2	GNL1	ABCB7
MAP4K2	FOXO1	BAD	C1D
TBC1D27	C11orf95	FADS3	LPAR6
APOA1	APBB1IP	COL9A2	MYH10
IGDCC3	RAB9B	PTPLAD1	VCAM1
ATG9B	RAD17	MIS18A	CYP3A7-CYP3AP1
CD5	MTSS1	OXCT2	CYBB
ACTRT3	FSTL1	COL11A2	CAPZA1
RFXANK	IL10RA	PSMC3IP	RARS
LOC100506504	BCAR3	ATHL1	SPCS2
WDR77	SMIM20	MPZL1	ZNF202
DLX3	ATF7IP2	RPP25	ERLIN2
LOC100288181	GDAP1	GOLGA2	IQGAP2
RCC2	ZNF112	DHX57	TRDV3
LINC01305	NR3C1	CENPU	ARL6IP5
LOC401913	SPRYD3	MT4	TLE2
LINC00537	BNIP2	EHMT2	DCTN6
MX2	PWAR6	CCDC170	HSPB8
CLDN18	CLDND1	LIMS2	FCGR2A
HLA-DOB	SON	PTPN18	FER
CXCL17	S100A12	HIST1H2BM	SAMM50
SOX13	AAMDC	LMAN2	RAB31
CBLN1	FCER1G	RAD54B	TRIM22
GNB1L	ZNF514	ABCF2	ATP6V1D
ZNF740	ZNF33B	MTA1	CHP1
CALR3	LOC101927451	KRT35	ARL1
LINC00163	CYLD	DGKA	RP11-499E18.1
CTD-2377D24.6	CEPT1	ADAM12	ANXA7
KRTAP17-1	MIR34A	KRT8	SLC25A28
CMTM7	PDE2A	PROSER1	WIPF1
CACNG4	MTRF1L	CAD	ADCY9
LSMEM2	INO80C	TBC1D22B	FLNC
GJB5	SGK223	RPP38	TMEM70
CHCHD10	PTPRC	FTSJ1	CKMT2
EDN2	C17orf85	THRB	SEL1L
MEGF11	ZSCAN31	ECT2	RAB11A
BTBD11	CHST15	ITGB1BP2	KTN1
FANCC	JAM2	ARL6IP4	PELO
GPIHBP1	ITGA1	STX3	NGDN
CDX4	UBL3	GPRC5B	CCNG1
LOC101060264	SULF1	RPL19	RPL31
TMEM177	EDEM1	PIP	KCNK5
XRCC3	LYSMD4	FOXA2	IFRD1
CRTAC1	BEAN1	MAPKAPK5-AS1	STK39
TFF2	SELENBP1	THEMIS2	FCGR2B
DCAF11	KDSR	ITGB2	RAPGEF4
PTCHD2	ATP2C1	BUD31	RAB11FIP3
ASPM	LOC101593348	SLC8A1	NR2C1
RP11-448A19.1	PCDHB16	CLDN16	ACTR8
LOC100506172	MET	ADAMTS8	FMO1
CTD-2008P7.1	SPATA6	OLFML2A	ABCC5
RP11-532F12.5	ERCC5	KLF13	CRBN
ACSM2A	MAP3K5	TSKS	ZNF3
ARHGAP33	CNEP1R1	SETD8	HOXA5
GDF9	GNRH1	INSRR	OSBPL8
LINC00612	STXBP1	RPS10	TRIM37
TEX28	MSANTD2	TEX264	C9orf78
FABP6	ODF3B	SH2B2	GPALPP1
MASTL	CD1D	RHOF	SLC28A3
CST5	TIMP2	AATK	GCH1
HIST1H3B	HEATR5A	DOPEY2	DPEP2
SCARNA2	SPTA1	MTL5	COLGALT2
C10orf99	TFE3	ALOX12P2	RANBP6
LOC101928255	RUNX1-IT1	ITGA7	PAFAH1B1
LOC100287877	KDELC1	ZNF428	ZCCHC24
POU5F2	TXNRD1	CACTIN	UTP18
LA16c-380H5.5	MYOM2	NCAPG2	CACNB3
MGC12916	ELFN1	MYO10	TJP1
SRC	LOC100505715	ADCY3	NCF1
RPS8	RP11-5C23.1	BSG	GTF2B
ADH7	COPB1	PTH2R	CDK7
TEX19	ENGASE	RFX3	PEX2
LINC00901	RP11-342L8.2	INHBA	MANBA
AC005785.2	MAN2B2	CAPZB	LMBR1L
TUBA4A	IGFBP1	PRKACA	RAB1A
RGS14	LOC153682	LPPR3	RNF14
GTSF1L	CFHR2	FLT4	HCFC2
CACNA1B	ZKSCAN7	SLC39A2	BANK1
VWA5B2	LOC100288911	MGAT4B	KIAA1462
IL37	ZBTB34	SLC10A3	PAF1
EXPH5	AX748339	TXN	ZNF562
LOC101928196	LINC00889	CISH	SLC7A6
MYBPC2	CCZ1B	LPP	KIAA1279
LOC101927641	IRF2	GPR20	TRAF3IP3
BYSL	CPXM1	ECSIT	15-Sep
SLC47A2	IL7	CDK5RAP2	SLC35A5
ADCK5	SLIT3	STC2	MMADHC
MRGBP	GGT5	SLC30A3	MTSS1
AP1M2	FOLR2	GSTM4	ZC2HC1A
TYMS	CTSF	SF3A3	SCPEP1
ATP6V0E2	CDK10	CDH6	TK2
OR51M1	PIK3IP1	CLPB	KANK1
URB2	LRRN3	PAPOLB	TMEM45A
GPR12	B3GNT1	CSTF2	TRIM14
KAAG1	UTP6	PLEKHF1	LTN1
FAM47C	ZNF547	SLC12A3	SLC25A13
TINAG	MUS81	SPSB3	RRAGA
STEAP1B	TTLL7	RTEL1	VWA5A
ART1	LOC101927204	HIST1H2BO	SKP1
FBXO40	GRAMD1B	UBE2NL	ISCA1
CLDN17	NKX2-3	CAPN5	CSRNP2
CLEC5A	CNOT7	SDF4	MORF4L1
GPR17	SLC25A25	GPR32	RRAGB
CDH24	DDB2	MYO1A	GOLGB1
NPHP1	FGL2	HEYL	RPF1
TOP1MT	ZBTB8A	SH3GLB2	GUSB
COPS7B	DYNC2LI1	ADCY1	DYRK1A
ANGPT4	LOC399491	ALDH4A1	RPS6KA3
ATHL1	WIPF2	IFNA2	PDE8A
MFSD6L	NCF1	SPIB	CNOT2
OR5L2	RIT1	NAA60	NHP2L1
WFDC6	RAB11FIP2	PLCB3	GOT2
CAMK2G	SUPT20H	SFXN1	VPS26A
MUTYH	WDR11	ZNF136	THOC1
LDB3	ADAMTS17	OXTR	SERPINA1
LOC100507634	CEP95	LMNB1	CHCHD7
TMCC2	FAM114A2	RNF126	FERMT2
NUP93	ZNF493	MX2	FRRS1L
SMARCC1	DOPEY1	SEPW1	PPP2R5E
WFDC8	ARHGAP10	MCM6	GOLGA3
TMEM229B	MSRB2	PSMC4	DNAJC6
FLJ37201	ANKRA2	ATP5E	NSUN6
HOXC-AS3	TCF4	DPP3	ESD
KRTAP4-12	TM6SF1	HGFAC	TBCA
LOC219688	SH3BP5-AS1	APOC1	EIF2B2
FCER2	PAN2	MYB	METAP1
KLK4	FBXL17	OPHN1	FAM98A
ARRDC3-AS1	SFPQ	CRCP	RAB22A
RACGAP1P	ZBTB1	ZNF787	RNF13
RP11-21L23.2	C4orf3	TSPO2	KRT19
SLC2A2	TUBG2	NOVA2	HAUS3
YKT6	ZNF19	CDH15	CD2BP2
NTSR2	CYB5A	MTA2	BEX1
XAGE-4	COTL1	DHTKD1	MPP1
PUS7	DSTYK	GPR116	RNF6
LINC01104	METTL9	RYR1	SERINC3
TMPRSS2	BBS9	SLC6A13	TRADD
TAF2	STARD5	TMCC2	IQCB1
AK7	ZNF665	CHERP	DNAJC16
OTC	SHOX2	ZNF273	ATXN10
GPR52	VTI1B	UBA52	KDM5B
MGC45800	ZC3H6	HTR3A	RECQL
LOC400622	ATG12	LYZL6	AAMDC
LOC339874	LOC401463	UTRN	LINC00094
RP11-59H7.3	DDX5	DEFB126	ZNF292
AHR	DFNB31	CTSD	SAT1
RILP	BIRC3	CYP7B1	UBE2K
ELAVL3	SUPT7L	CDH20	KLF4
MYO1H	TAF15	LPCAT1	ZSCAN18
KRBA1	HERC1	ELN	TLR7
FBP2	ZSCAN26	PTGES2	NEBL
TEX13B	AMICA1	GPR153	GALNT14
OAZ3	HPS4	KAT2A	LAMA2
FCN2	LOC283070	ACAP1	HPS5
AC005592.3	GRAMD3	NPM3	FTSJ3
EFNA2	SRSF7	DSG3	RPRM
HHLA1	PWWP2A	CHST10	BIRC2
LOC101060553	FCHO2	LRIF1	USP34
LOC101928767	CLDN1	KCNAB2	MTMR1
LOC100505592	LINC00478	GSN	C12orf5
KIAA1751	C16orf62	KRTAP5-9	ADH1A
SMOC1	SYNGR1	ABHD17A	MRPS27
KCNE1L	REC8	MMP25	CD244
TMEM74B	YTHDC1	RRP1	FAM149A
LOC653160	LHFPL2	GPX5	ZRSR2
ZFHX4-AS1	RRN3P2	AEN	CDK12
PAX1	ATP11A	HTR6	ZBTB40
LGI3	TCEAL4	ADAMTS7	MYO9A
GATSL3	MBNL1	ELK4	KDELC1
SEMA4B	LURAP1L	CYP11B2	PARD3
LOC100289495	TRIM38	JUN	TAF1C
LOC102724842	SPTBN1	GFOD1	ELF4
FLJ33534	ZFYVE20	SKIV2L	CCNH
LOC101929683	ARL14EP	PRDM9	SATB1
ARG2	SIPA1L1	LHPP	IPO5
APOC2	PLA2G12A	PRO2964	TM2D1
CCL17	GLTSCR1L	BRCA1	ANKRD11
AVPR2	HP	WHSC1	SPTAN1
RP1-155D22.1	PNRC2	CCDC22	KHDRBS1
CERCAM	TBC1D1	OR7C1	GAA
LOC101929260	ZNF222	PDCD1LG2	FKTN
LINC00652	NR2C2	SYT2	ENPP4
HOXB9	DCTN6	FAM110D	CEP290
LOC100505666	IFT88	URM1	PLXNC1
CLMN	SLC7A6OS	FER1L4	SDHD
IL17RC	TNFRSF1A	CAMK2B	UFC1
SNAI1	NFATC3	HILPDA	ISCU
IGF2BP2	KIAA0355	DOLPP1	PCMTD2
HRH3	MIR100HG	XPNPEP2	NCK1
ABCC12	VPS36	MAD2L1	NECAP1
PATL1	PDGFRL	XPNPEP3	SRP72
KCNJ11	R3HCC1	APOLD1	TRIM38
LOC100506885	ZADH2	CYP1A2	ADNP
LOC644852	PLEK	KRT6B	STK3
IZUMO4	ASAH1	ATF5	EPB41L2
PLIN5	FGD3	ZNF821	ATP5A1
PVRL1	PRDM6	MRPL13	SEMA3D
NODAL	KIAA0753	COMP	ABCD4
[truncated: 6,335 more rows]
